# Supplementary material
Source: PubMed Central journal article supplement (PMC10482195)
Supplement: NIHMS1922547-supplement-nn-2022-03219a_SI_5.pdf [file NIHMS1922547-supplement-nn-2022-03219a_SI_5.pdf]

## Supporting Information

# Protease-responsive peptide-conjugated mitochondrial-targeting AIEgens for selective imaging and inhibition of SARS-CoV-2-infected cells

Yong Cheng,<sup>1</sup> Alex E. Clark,<sup>2</sup> Jiajing Zhou,<sup>1</sup> Tengyu He,<sup>3</sup> Yi Li,<sup>1</sup> Raina M. Borum,<sup>1</sup> Matthew N. Creyer,<sup>1</sup> Ming Xu,<sup>1</sup> Zhicheng Jin,<sup>1</sup> Jingcheng Zhou,<sup>1</sup> Wonjun Yim,<sup>3</sup> Zhuohong Wu,<sup>1</sup> Pavla Fajtová,<sup>4</sup> Anthony J. O'Donoghue,<sup>4</sup> Aaron F. Carlin,<sup>2</sup> Jesse V. Jokerst<sup>1, 3, 5\*</sup>

<sup>1</sup>Department of NanoEngineering, University of California, San Diego, La Jolla, CA 92093, USA

<sup>2</sup>Department of Medicine, University of California, San Diego, La Jolla, CA 92037, USA

<sup>3</sup>Materials Science and Engineering Program, University of California, San Diego, La Jolla, CA 92093, USA

<sup>4</sup>Skaggs School of Pharmacy and Pharmaceutical Sciences, University of California, San Diego, La Jolla, CA 92093, USA

<sup>5</sup>Department of Radiology, University of California, San Diego, La Jolla, CA 92093, USA

✉E-mail: [jjokerst@eng.ucsd.edu](mailto:jjokerst@eng.ucsd.edu)

## Table of Contents

### Supplementary synthesis and characterization

1. Materials and methods.
2. Molecular design, imaging mechanism and M<sup>pro</sup> peptide sequence.
3. Synthesis and Characterization.
  - 3.1 Synthesis of PyTPE.
  - 3.2 Synthesis of PSMR.
  - 3.3 Synthesis of PSGMR.
  - 3.4 Synthesis of PMR.

### Supplementary Schemes

- S1. The mechanism of PSGMR for SARS-CoV-2 theranostic.
- S2. The synthetic route of PyTPE.
- S3. The synthetic route of PGMR.
- S4. The synthetic route of PSGMR.
- S5. The synthetic route of PMR.

### Supplementary Table

- S1. Peptide sequences used in this study.

### Supplementary Figures

- S1. Electrospray ionization mass spectrometry (ESI-MS) results of PyTPE.
- S2. ESI-MS results of SMR
- S3. High resolution mass spectra (HRMS) results of SMR with five positive charges.
- S4. ESI-MS results of c PSMR.
- S5. HRMS results of PSMR with five positive charges.
- S6. ESI-MS results of SGMR.
- S7. ESI-MS results of PSGMR.
- S8. ESI-MS results of MR.
- S9. ESI-MS results of PMR.
- S10. HPLC results of different peptides before and after incubation with M<sup>pro</sup>.
- S11. HPLC and ESI-MS results of RVRRS AVLQSGFRKMAC incubation with M<sup>pro</sup>.
- S12. HPLC and ESI-MS results of CGKLVFFGTS AVLQSGFRGDDD incubation with M<sup>pro</sup>.
- S13. Molecular docking results of SARS-CoV-2 M<sup>pro</sup> in complex with peptides.
- S14. HPLC results of PSGMR, PMR, and PSMR incubation with M<sup>pro</sup>.
- S15. ESI-MS results of PSGMR incubation with M<sup>pro</sup> for 1 h and 24 h.
- S16. ESI-MS results of PMR incubation with M<sup>pro</sup> for 1 h and 24 h.
- S17. ESI-MS results of PSMR incubation with M<sup>pro</sup> for 1 h and 24 h.
- S18. Critical micelle concentrations of PSGMR and PSMR after incubation with M<sup>pro</sup>.
- S19. Time-dependent fluorescence spectra of PSGMR incubation with M<sup>pro</sup>.
- S20. Time-dependent fluorescence spectra of PMR incubation with M<sup>pro</sup>.
- S21. Time-dependent fluorescence spectra of PSMR incubation with M<sup>pro</sup>.
- S22. Fluorescence spectra of PSGMR with different concentration of M<sup>pro</sup>.
- S23. Fluorescence spectra of PyTPE with different concentration of BSA.

- S24. TEM images and hydrodynamic size of 20 mM Tris-HCl buffer.
- S25. TEM images and hydrodynamic size of 1  $\mu$ M, 10  $\mu$ M, 100  $\mu$ M, and 200  $\mu$ M PSGMR incubated with M<sup>pro</sup>.
- S26. TEM images and hydrodynamic size of 1  $\mu$ M, 10  $\mu$ M, 100  $\mu$ M, and 200  $\mu$ M PMR incubated with M<sup>pro</sup>.
- S27. Circular dichroism spectra of 20 mM Tris-HCl buffer and PSGMR before and after incubation with M<sup>pro</sup>.
- S28. Photostability assay of MTG, PyTPE, PSGMR, and PMR.
- S29. Confocal laser scanning microscopy (CLSM) images and Pearson correlation coefficient of co-localization of HeLa cells incubated with Hoechst 33258, MTG and PyTPE.
- S30. CLSM images of HeLa cells incubated with PyTPE, PSGMR, and PMR.
- S31. Z-stack images of HeLa cells incubated with PyTPE and PSGMR.
- S32. Metabolic activity of HEK 293T cells and plasmid transfected HEK 293T cells were studied with different probes.
- S33. CLSM images of HEK 293T cells incubation with Hoechst 33258, PSGMR, and PI.
- S34. Flow cytometric analysis of FlipGFP plasmid, PR8 plasmid, and M<sup>pro</sup> plasmid-transfected HEK 293T cells treated with PSGMR and PI.
- S35. Z-stack images of M<sup>pro</sup> plasmid-transfected HEK 293T cells incubated with FlipGFP plasmid or PSGMR.
- S36. Photostability studies of M<sup>pro</sup> plasmid- and FlipGFP plasmid-transfected HEK 293T cells incubated with PSGMR and Hoechst 33258 under the increasing number of bleaching.
- S37. CLSM images of M<sup>pro</sup> plasmid transfected HEK 293T cells incubation with Hoechst 33258, MTG, and PSGMR for different time.
- S38. CLSM images and Pearson correlation coefficient of co-localization of M<sup>pro</sup> plasmid transfected HEK 293T cells incubation with Hoechst 33258, MTG, and PSGMR.
- S39. CLSM images and Pearson correlation coefficient of co-localization of the SARS-CoV-2-infected TMPRSS2-Vero cells with Alexa 488 (Capsid and M<sup>pro</sup>) and PSGMR.
- S40. CLSM images of SARS-CoV-2 infected TMPRSS2-Vero cells incubation with PSGMR.
- S41. CLSM images of SARS-CoV-2 infected TMPRSS2-Vero cells incubation with PMR.
- S42. CLSM images of SARS-CoV-2 infected TMPRSS2-Vero cells incubation with PSGMR, and Alexa 488.
- S43. CLSM images of SARS-CoV-2 infected TMPRSS2-Vero cells incubation with PSGMR, and PMR.
- S44. Three-dimensional map of SARS-CoV-2 infected TMPRSS2-Vero cells for incubation with PSGMR and PMR.

## References

### Supplementary Movies

Supplementary Movie S1

Description: SARS-CoV-2 infected TMPRSS2-Vero cells incubated with PSGMR, Hoechst 33258, PI, and Alexa 488 for nucleocapsid (Turn around X-axis).

Supplementary Movie S2

Description: SARS-CoV-2 infected TMPRSS2-Vero cells incubated with PSGMR, Hoechst 33258, PI, and Alexa 488 for nucleocapsid (Z-axis scanning).

Supplementary Movie S3

Description: SARS-CoV-2 infected TMPRSS2-Vero cells incubated with PSGMR, Hoechst 33258, PI, and Alexa 488 for M<sup>pro</sup> (Turn around X-axis).

Supplementary Movie S4

Description: SARS-CoV-2 infected TMPRSS2-Vero cells incubated with PSGMR, Hoechst 33258, PI, and Alexa 488 for M<sup>pro</sup> (Z-axis scanning).

## 1. Materials and methods.

Rink-amide resin (particle size 100 to 150 mesh; loading 0.67 mmol/g), Fmoc-protected L-amino acids, and O-benzotriazole-N, N, N', N'-tetramethyl-uronium-hexafluorophosphate (HBTU) were purchased from AAPPTec, LLC. (Kentucky, USA). The 4-(1,2,2-triphenylvinyl) benzaldehyde, 1,4-dibromobutane, 4-methylpyridine, Hoechst 33258, and propidium iodide (PI) were purchased from Combi-Blocks, Inc. (San Diego, USA). Tris-(hydroxymethyl) aminomethane (Tris-base), tris-(hydroxymethyl) aminomethane hydrochloride and (Tris-HCl), sodium azide, sodium ascorbate, copper (I) iodide, N, N-diisopropylethylamine (DIPEA), thrombin, hemoglobin, albumin bovine serum, lipopolysaccharide, and resazurin based in vitro toxicology assay kit were purchased from Sigma-Aldrich (Missouri, USA). CGAVLQDDD, AVLQFFVLKC, RVRRS AVLQSGFRKMAC, and CGKLVFFGTSAVLQSGFRGDDD were purchased from Genscript Inc. (New Jersey, USA).

The SARS-CoV-2 M<sup>pro</sup> expression plasmid was provided to us from Dr. Rolf Hilgenfeld, University of Lübeck, Germany. Recombinant SARS-CoV-2 M<sup>pro</sup> was expressed and purified as described previously in 20 mM Tris-HCl buffer (pH 8.0) with 150 mM NaCl, 1 mM DTT, and 5 % glycerol.<sup>1</sup> A SARS-CoV-2 M<sup>pro</sup> plasmid, an influenza virus protein (A/PR8/1834 NP, PR8 in short) plasmid, and a M<sup>pro</sup>-related FlipGFP reporter plasmid were a kind gift from Nicholas S. Heaton.<sup>2</sup> M<sup>pro</sup> inhibitor GC376 was purchased from Selleckchem, LLC. (Houston, USA). HEK 293T cells were a kind gift from Dr. Liangfang Zhang. All other reagents were obtained from commercial sources and used without further purification. Deionized water (18.2 MΩ·cm) used in all experiments was purified with a Milli-Q Academic water purification system (Millipore Corp., Billerica, MA, USA).

Peptides were synthesized using an AAPPTec Eclipse system through standard solid phase Fmoc syntheses on rink-amide resin. Electrospray ionization mass spectrometry (ESI-MS) data was acquired by using a Micromass Quattro Ultima mass spectrometer. High resolution mass spectra (HRMS) were recorded on a Bruker microTOF II mass spectrometer system. High performance liquid chromatography (HPLC) was performed by using a Shimadzu LC-40 HPLC system under the wavelength of 195 nm, 254 nm, and 405 nm. The sample was dissolved in water or acetonitrile, applied on a Zorbax 300 BS C18 column (5 μm, 9.4x250mm) from Agilent, and eluted at 1.5 mL/min with a 40 min gradient from 10% to 95% solvent B where solvent A is water (0.05% TFA solution) and solvent B is acetonitrile (0.05% TFA solution). All products were purified by HPLC to reach a purity of 90%. UV-Vis absorption and fluorescence spectra were performed on a Synergy H1 microplate reader (BioTek). Confocal laser scanning microscopy images were obtained on a Zeiss LSM880 confocal laser scanning microscope (Zeiss) at the school of medicine microscopy and histology core of University of California San Diego. Dynamic light scattering (DLS) measurements were performed on a Malvern NANO-ZS90 Zetasizer to determine hydrodynamic sizes and zeta potential values of the nanosystems studied. Transmission electron microscopy (TEM) images were acquired using an FEI Tecnai F20 instrument at an operation voltage of 200 kV. Circular dichroism (CD) experiments were performed on a CD spectrometer (AVIV, Model 215) using 2 mm quartz slides at 25 °C. Flow cytometric analysis was carried out under a flow cytometer (BD LSR Fortessa).

## 2. Molecular design and imaging mechanism.

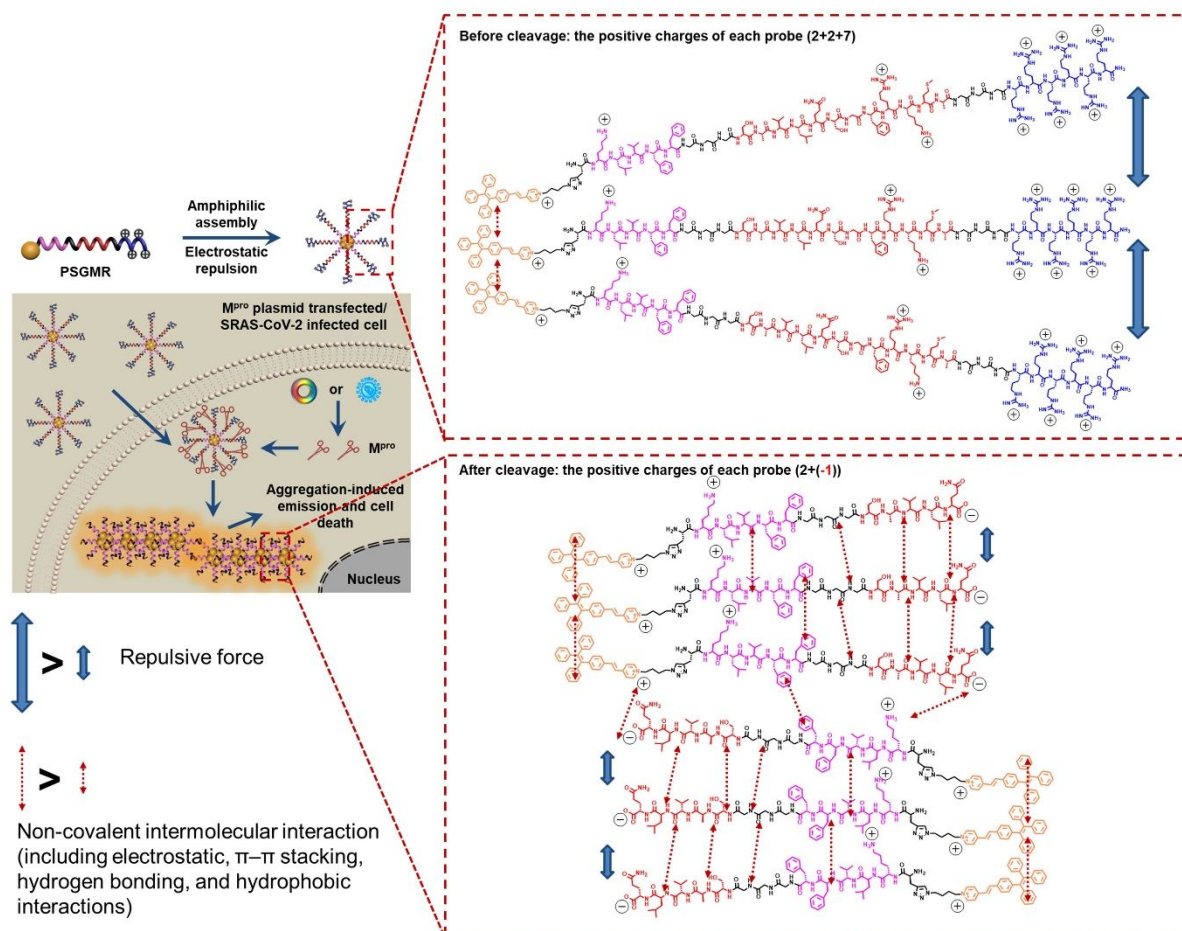

**Scheme S1.** The mechanism of PSGMR was used for selective imaging and inhibition of M<sup>pro</sup> plasmid-transfected or SARS-CoV-2-infected cells. The amphipathic PSGMR has 13 positive charges and can form loose nanoparticles due to the electrostatic repulsion. After cleavage by M<sup>pro</sup> and the absence of cationic polypeptides, the resulting PSG has four positive charges and a C-terminal carboxyl group to decrease the electrostatic repulsion and enhance the molecular interactions. The electrostatic attraction, decreased hydrophilicity, and increased self-assembly all increase aggregation of PSG to form nanofibers with strong yellow fluorescence.

SARS-CoV-2 M<sup>pro</sup> sequence:<sup>3</sup>

SGFRKMAFPSGKVEGCMVQVTCGTTTLNGLWLDDVVYCPRHVICTSEDMLNPNYED  
LLIRKSNHNFLVQAGNVQLRVIGHSMQNCVLKLVDTANPKTPKYKFVRIQPGQTF  
VLACYNGSPSGVYQCAMRPNFTIKGSFLNGSCGSVGFNIDYDCVSFCYMHMELPTG  
VHAGTDLEGNFYGPFVDRQTAQAAGTDTTITVNVLAWLYAAVINGDRWFLNRFTTT  
LNDFNLVAMKYNYEPLTQDHVDILGPLSAQTGIAVLDMCASLKELLQNGMNGRTIL  
GSALLEDEFTPFDVVRQCSGVTFQ

### 3. Synthesis and Characterization

**(1) PyTPE synthesis:**<sup>4, 5</sup> PyTPE was synthesized according to our previous reports and the procedures in the literatures.

**(2) Crude peptide synthesis:** 100 mg rink amide resin was chosen in solid-phase peptide synthesis. 2 x 4 mL 20% piperidine in DMF, 0.1 M amino acid in 3 mL DMF (5 equivalents), 0.1 M HBTU in 3 mL DMF (5 equivalents), and 0.2 M DIPEA in 3 mL DMF (10 equivalents) were used for each coupling cycle under the protection of nitrogen. After the completion of solid phase synthesis, peptides were cleaved of the resins by treating with cleavage cocktail containing 2.5 % thioanisole, 3% TIPS, 2.5% water, and 92% TFA for 3 hours followed by filtration to remove resin. Peptides were precipitated and centrifuged by addition of ice-cold diethyl ether to the filtrates. The residue was dissolved in 5 mL MeCN/H<sub>2</sub>O (v/v=1:1) solution and lyophilized. Crude peptides were purified using semi-preparative HPLC.

**(3) Coupling with PyTPE:**<sup>4, 5</sup> PyTPE (5.0 mg, 7.1 μmol), sodium ascorbate (0.7 mg, 3.6 μmol), copper (I) iodide (0.7 mg, 3.6 μmol), and the purified peptide (3.6 μmol) were dissolved in DMSO/H<sub>2</sub>O (v/v=1:1) solution, and stirred at 50 °C for 24 h under protection of nitrogen. The crude probes were purified using semi-preparative HPLC.

### 3.1 Synthesis of PyTPE.

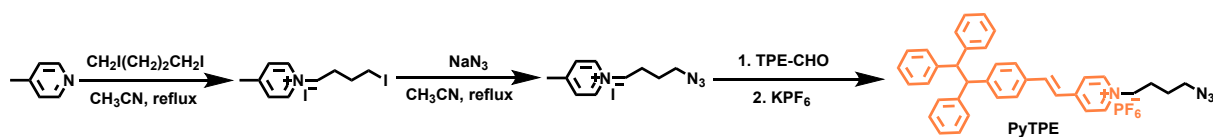

**Scheme S2.** The synthetic route of PyTPE.

The main synthetic route of PyTPE is three steps: (a) Synthesis of Py-I. (b) Synthesis of Py- $\text{N}_3$ , (c) Synthesis of PyTPE, HRMS (ESI) of PyTPE  $m/z$ :  $[\text{M}]^+$  calcd. for 533.2700; found, 533.3771.



### 3.2 Synthesis of PSMR.

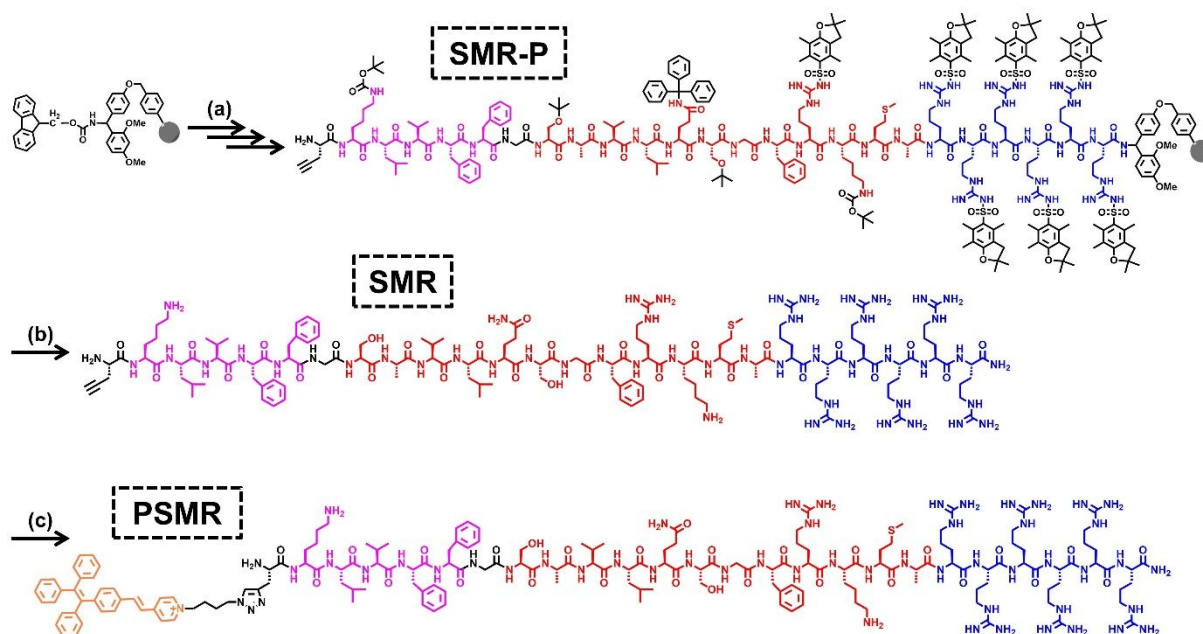

**Scheme S3.** The synthetic route of PSMR.

The main synthetic route of PSMR is three steps through standard solid phase Fmoc synthesis and copper-catalyzed azide-alkyne click reaction: (a) Synthesis of SMM-P. (b) Synthesis of SMR, HRMS (ESI)  $m/z$ :  $[M+4H]^{4+}/4$  calcd. for 754.9458; found, 755.5761.  $[M+5H]^{5+}/5$  calcd. for 604.1582; found, 604.6490.  $[M+6H]^{6+}/6$  calcd. for 503.6331; found, 504.0028. (c) Synthesis of PSMR, HRMS (ESI)  $m/z$ :  $[M+4H]^{4+}/4$  calcd. for 888.2633; found, 888.6069.  $[M+5H]^{5+}/5$  calcd. for 710.8122; found, 711.2593.  $[M+6H]^{6+}/6$  calcd. for 592.5115; found, 592.8325.  $[M+7H]^{7+}/7$  calcd. for 508.0109; found, 508.3657.

### 3.3 Synthesis of PSGMR.

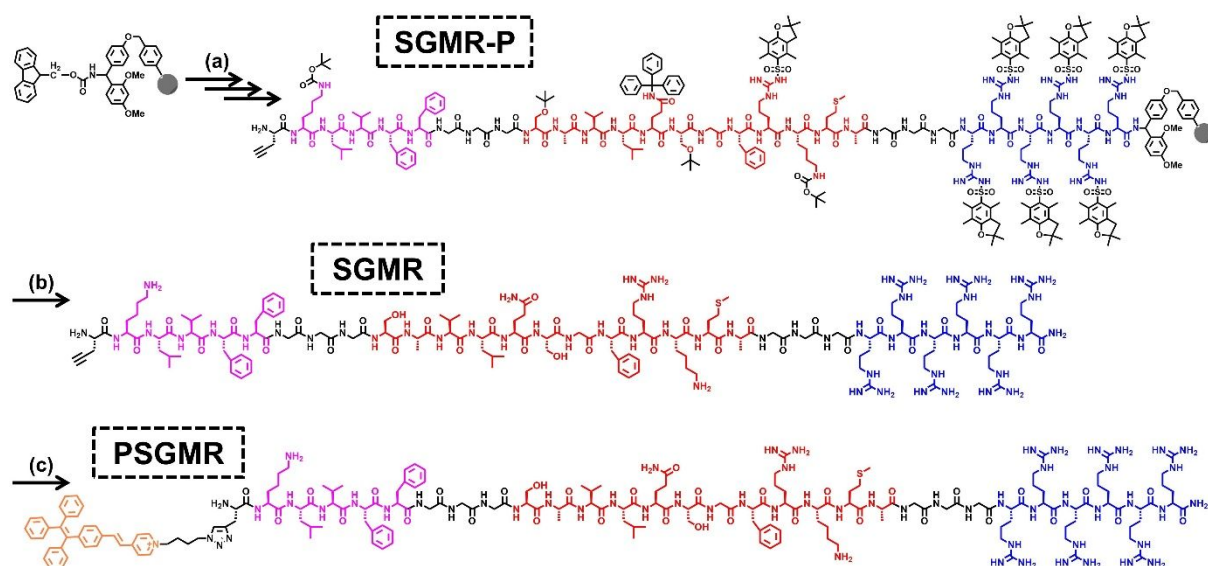

**Scheme S4.** The synthetic route of PSGMR.

The main synthetic route of PSGMR is three steps through standard solid phase Fmoc synthesis and copper-catalyzed azide-alkyne click reaction. (a) Synthesis of SGMR-P. (b) Synthesis of SGMR, HRMS (ESI)  $m/z$ :  $[M+4H]^{4+}/4$  calcd. for 826.2213; found, 826.8641.  $[M+5H]^{5+}/5$  calcd. for 661.1786; found, 661.6305.  $[M+6H]^{6+}/6$  calcd. for 551.1502; found, 551.5397. (c) Synthesis of PSGMR, HRMS (ESI)  $m/z$ :  $[M+5H]^{5+}/5$  calcd. for 767.8326; found, 768.2742.  $[M+6H]^{6+}/6$  calcd. for 640.0285; found, 640.3345.  $[M+7H]^{7+}/7$  calcd. for 548.7398; found, 549.0886.  $[M+8H]^{8+}/8$  calcd. for 480.2733; found, 480.9323.

### 3.4 Synthesis of PMR.

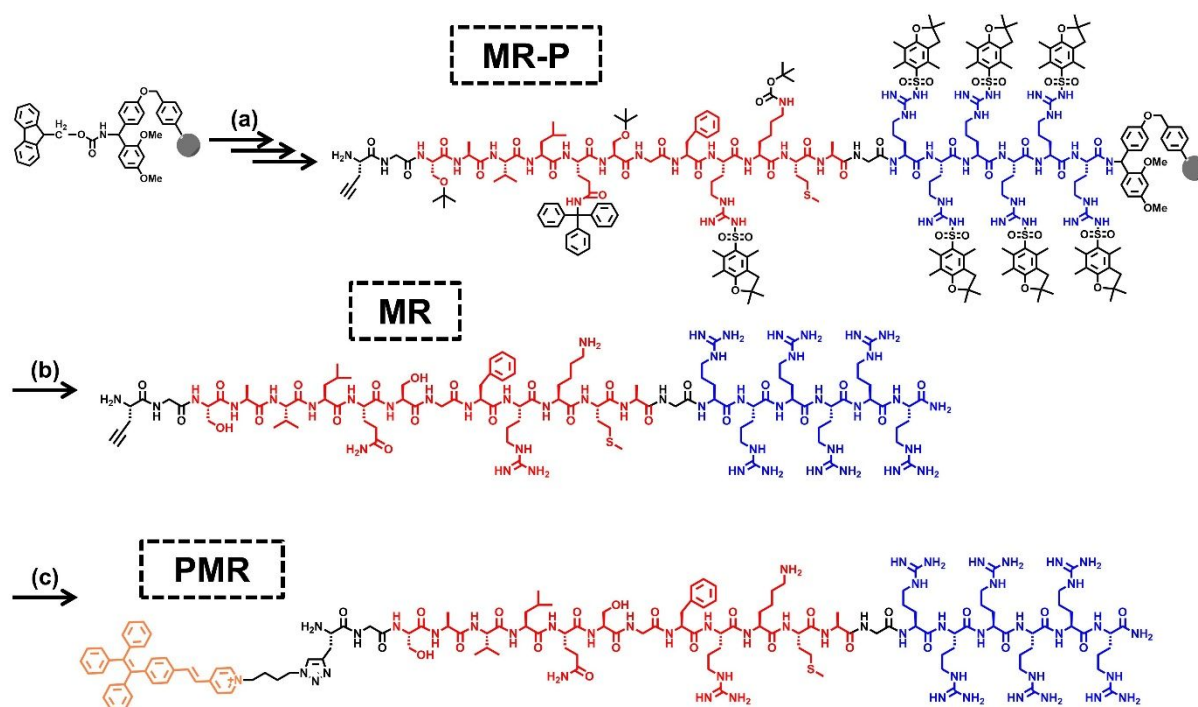

**Scheme S5.** The synthetic route of PMR.

The main synthetic route of PMR is three steps through standard solid phase Fmoc synthesis, thiol-maleimide Michael addition and copper-catalyzed azide-alkyne click reaction. (a) Synthesis of MR-P. (b) Synthesis of MR, HRMS (ESI)  $m/z$ :  $[M+3H]^{3+}/3$  calcd. for 813.8029; found, 814.3572.  $[M+4H]^{4+}/4$  calcd. for 610.5042; found, 611.1230.  $[M+5H]^{5+}/5$  calcd. for 488.6849; found, 489.0517. (c) Synthesis of PMR, HRMS (ESI)  $m/z$ :  $[M+4H]^{4+}/4$  calcd. for 743.9216; found, 744.3828.  $[M+5H]^{5+}/5$  calcd. for 595.3388; found, 595.7583.  $[M+6H]^{6+}/6$  calcd. for 496.2837; found, 496.5610.  $[M+7H]^{7+}/7$  calcd. for 425.5299; found, 425.8732.

**Table S1.** Peptide sequences used in this study.

| Peptide name                                                            | Sequences                                    |
|-------------------------------------------------------------------------|----------------------------------------------|
| 1                                                                       | CG <b>AVLQ</b> /DDD                          |
| 2                                                                       | <b>AVLQ</b> /FFVLKC                          |
| 3                                                                       | RVRRSAVLQ/SGFRKMAC                           |
| 4                                                                       | CGKLVFFGTS <b>AVLQ</b> /SGFRGDDD             |
| MR                                                                      | (Pra)G <b>SAVLQ</b> /SGFRKMAGRRRRRR          |
| SMR                                                                     | (Pra)KLVFFG <b>SAVLQ</b> /SGFRKMARRRRRR      |
| SGMR                                                                    | (Pra)KLVFFGGG <b>SAVLQ</b> /SGFRKMAGGGRRRRRR |
| The bold indicates the potential M <sup>pro</sup> -responsive sequence. |                                              |

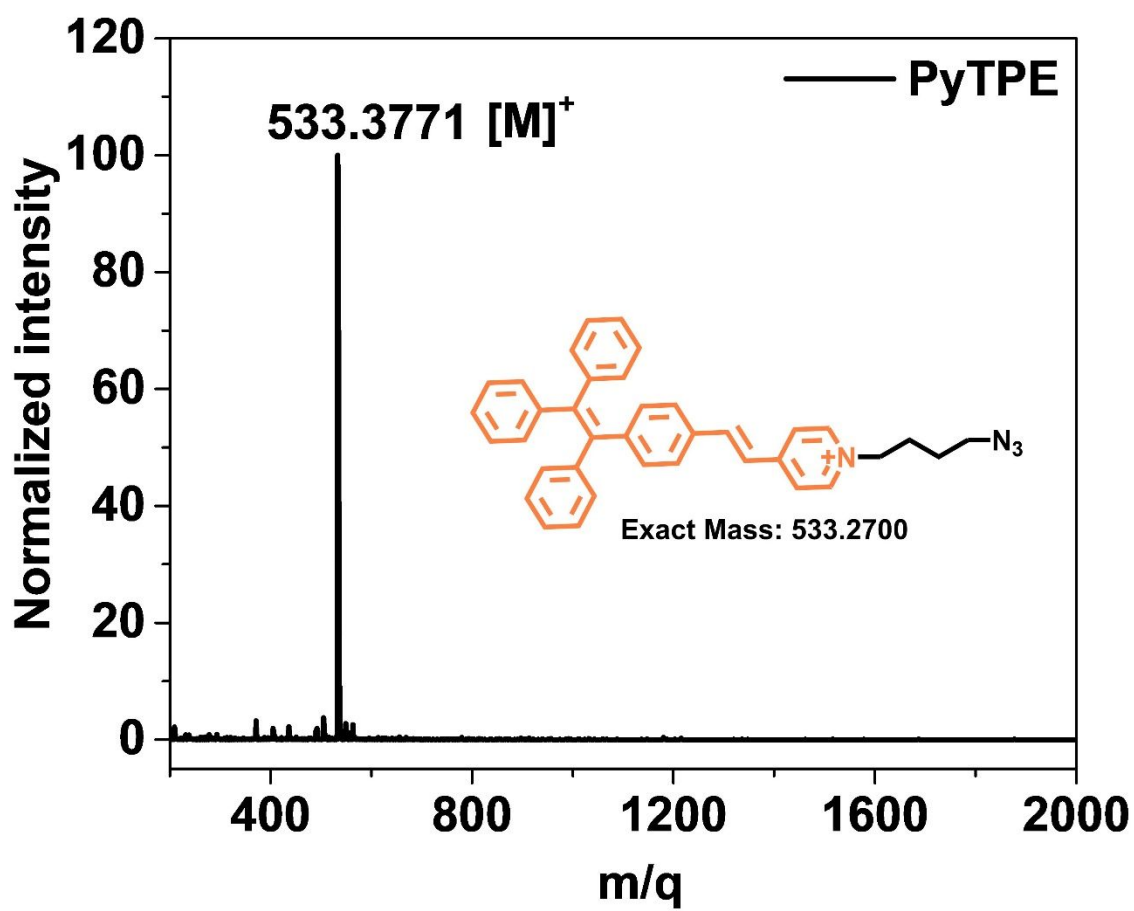

Figure S1. Electrospray ionization mass spectrometry (ESI-MS) results of PyTPE.

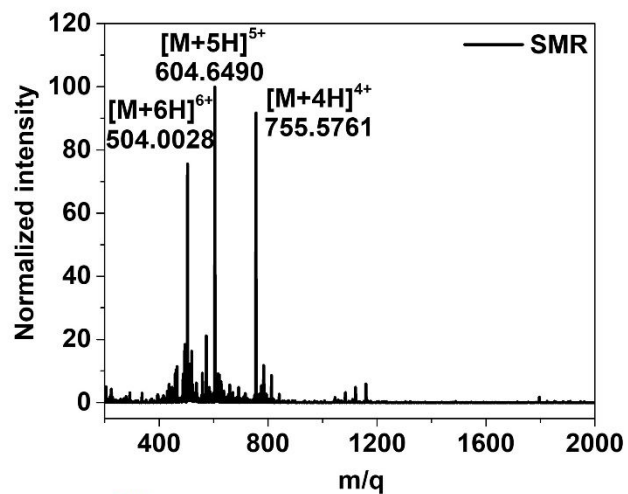

| n               | [M+nH]    | M/q       |
|-----------------|-----------|-----------|
| 0               | 3015.7518 |           |
| 1               | 3016.7597 | 3016.7597 |
| 2               | 3017.7675 | 1508.8838 |
| 3               | 3018.7753 | 1006.2584 |
| 4               | 3019.7831 | 754.9458  |
| 5               | 3020.7910 | 604.1582  |
| 6               | 3021.7988 | 503.6331  |
| Calculated data |           |           |

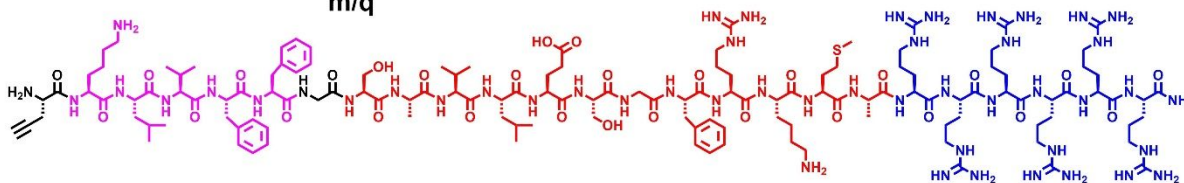

**Figure S2.** ESI-MS results of SMR.

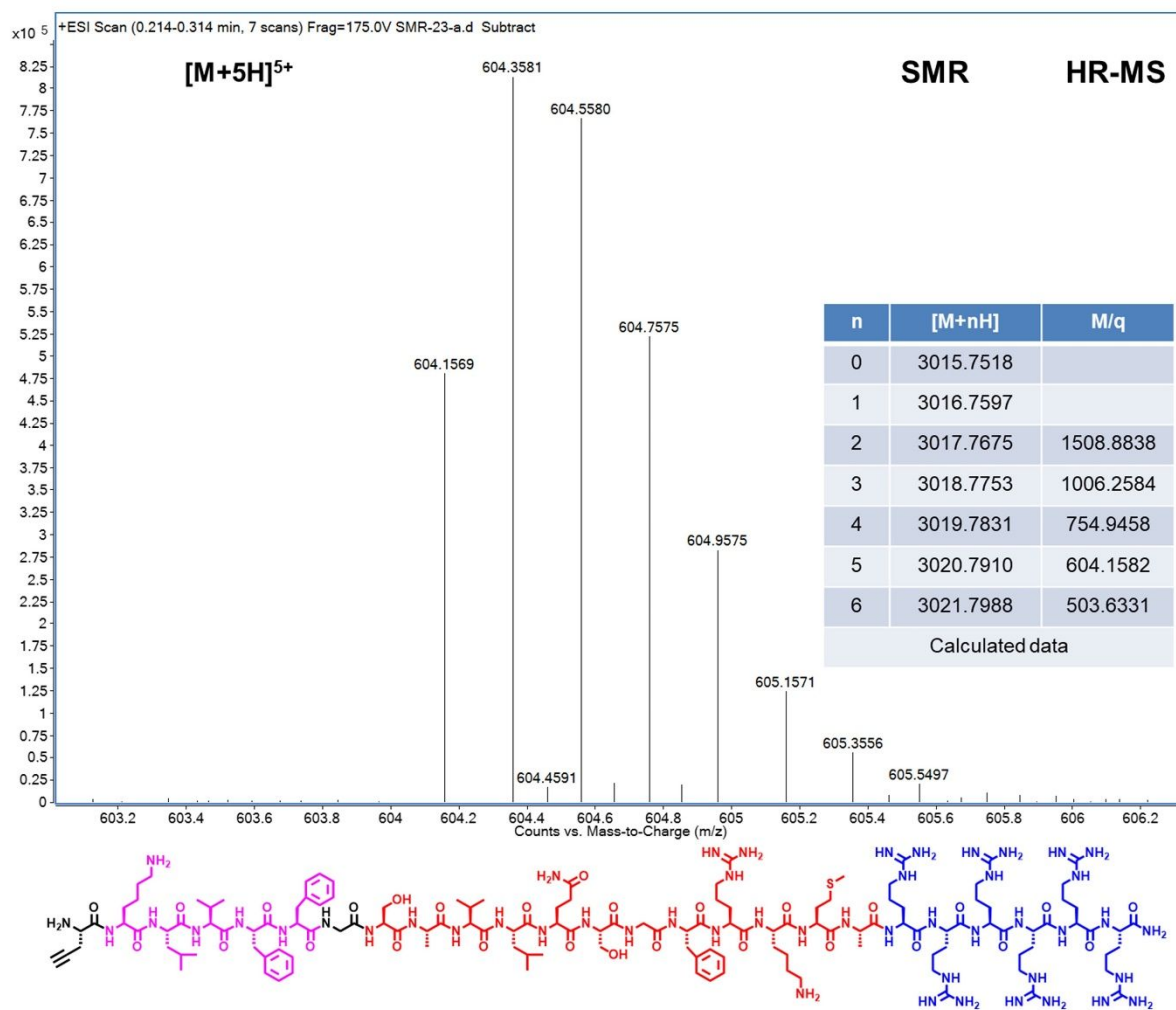

**Figure S3.** High resolution mass spectra (HRMS) results of SMR with five positive charges.

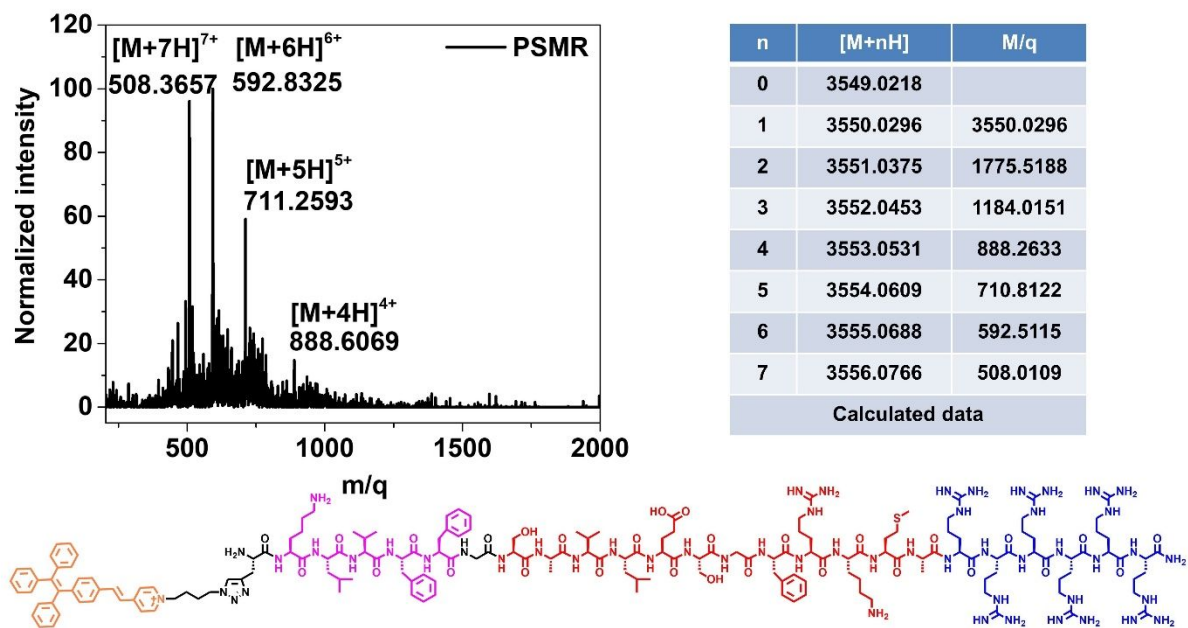

Figure S4. ESI-MS results of PSMR.



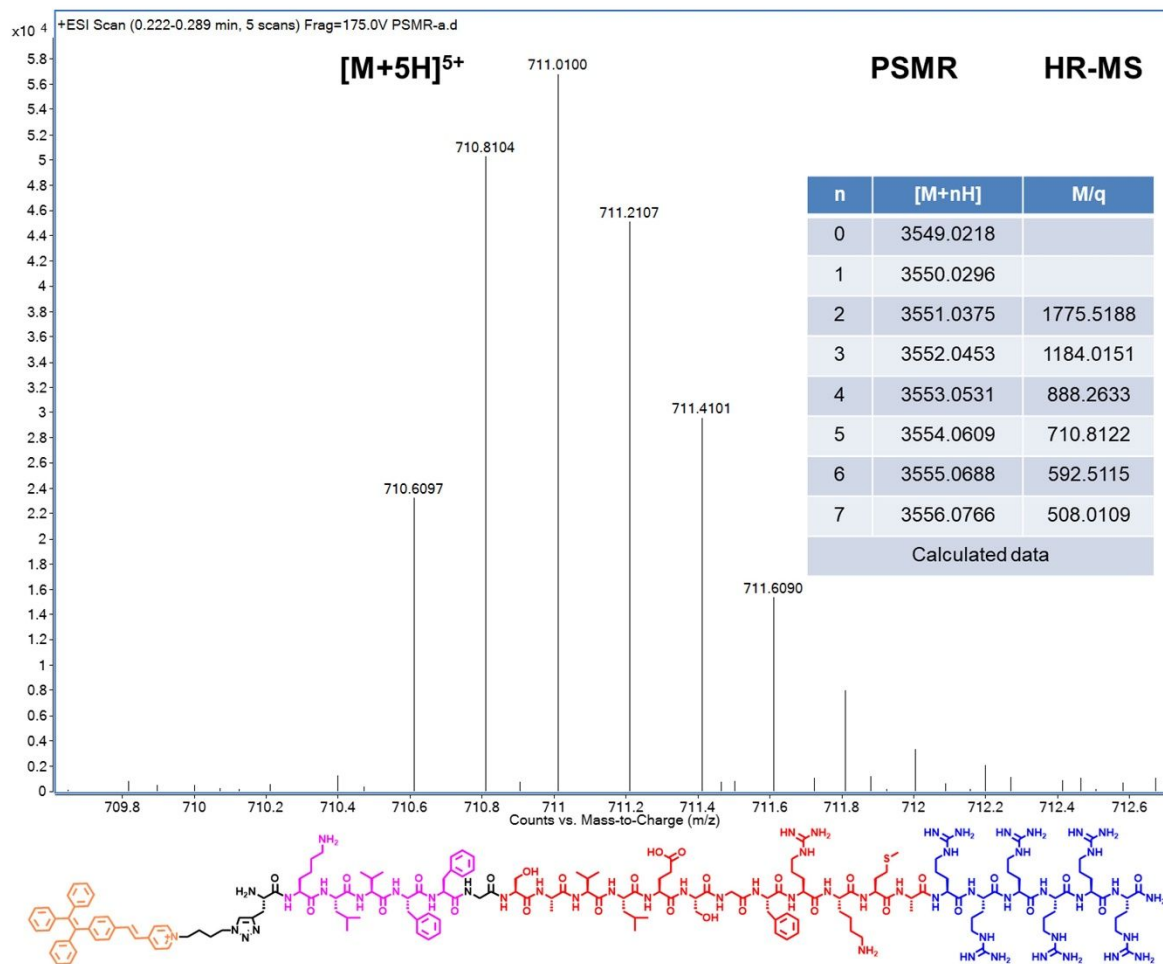

**Figure S5.** HRMS results of PSMR with five positive charges.

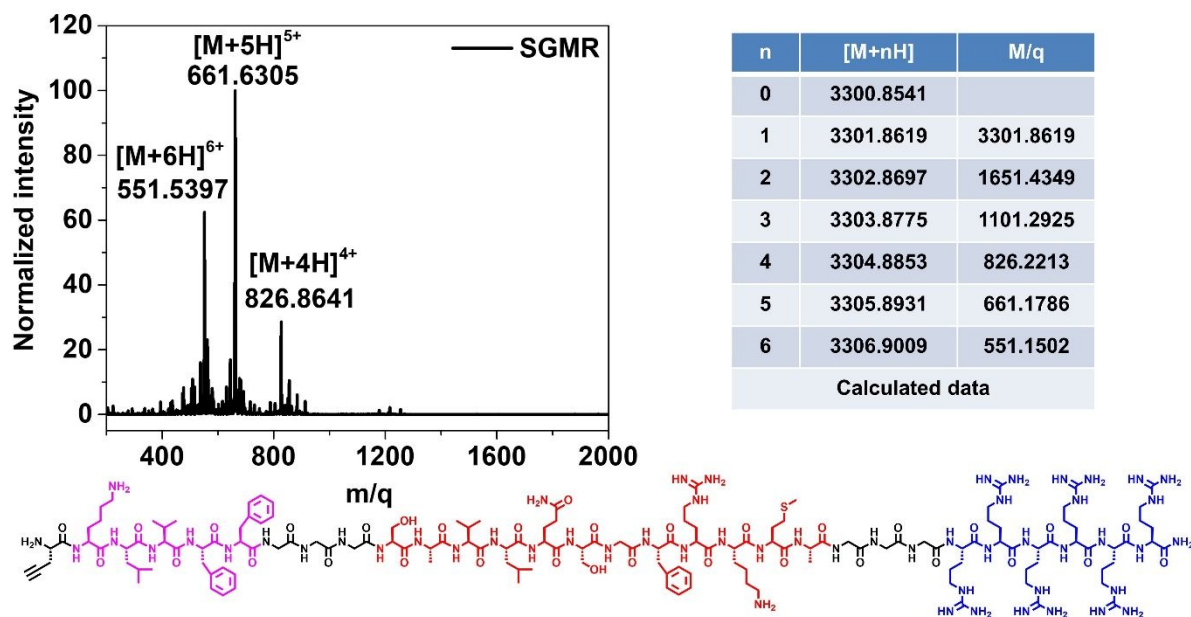

**Figure S6.** ESI-MS results of SGMR.

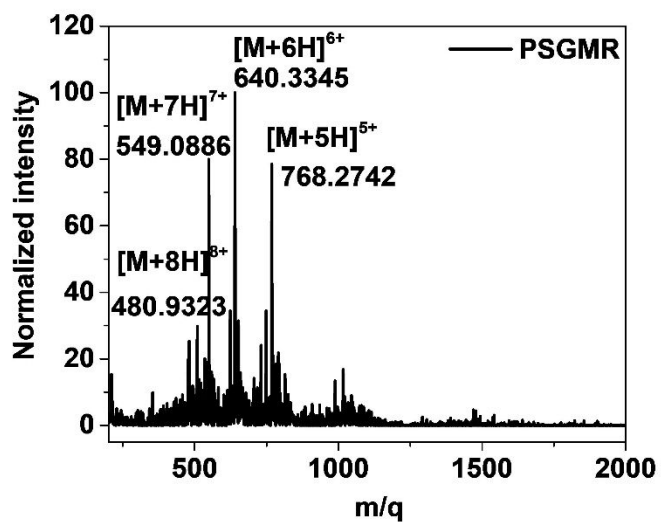

| n               | [M+nH]    | M/q       |
|-----------------|-----------|-----------|
| 0               | 3834.1239 |           |
| 1               | 3835.1317 | 3835.1317 |
| 2               | 3836.1395 | 1918.0698 |
| 3               | 3837.1473 | 1279.0491 |
| 4               | 3838.1551 | 959.5388  |
| 5               | 3839.1629 | 767.8326  |
| 6               | 3840.1707 | 640.0285  |
| 7               | 3841.1785 | 548.7398  |
| 8               | 3842.1863 | 480.2733  |
| Calculated data |           |           |

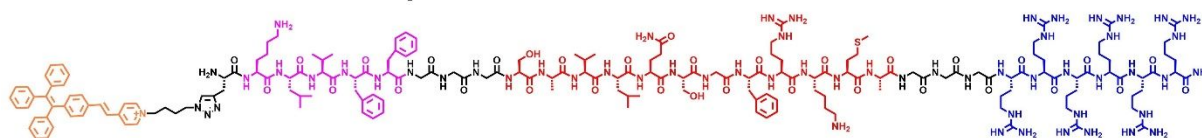

**Figure S7.** ESI-MS results of PSGMR.

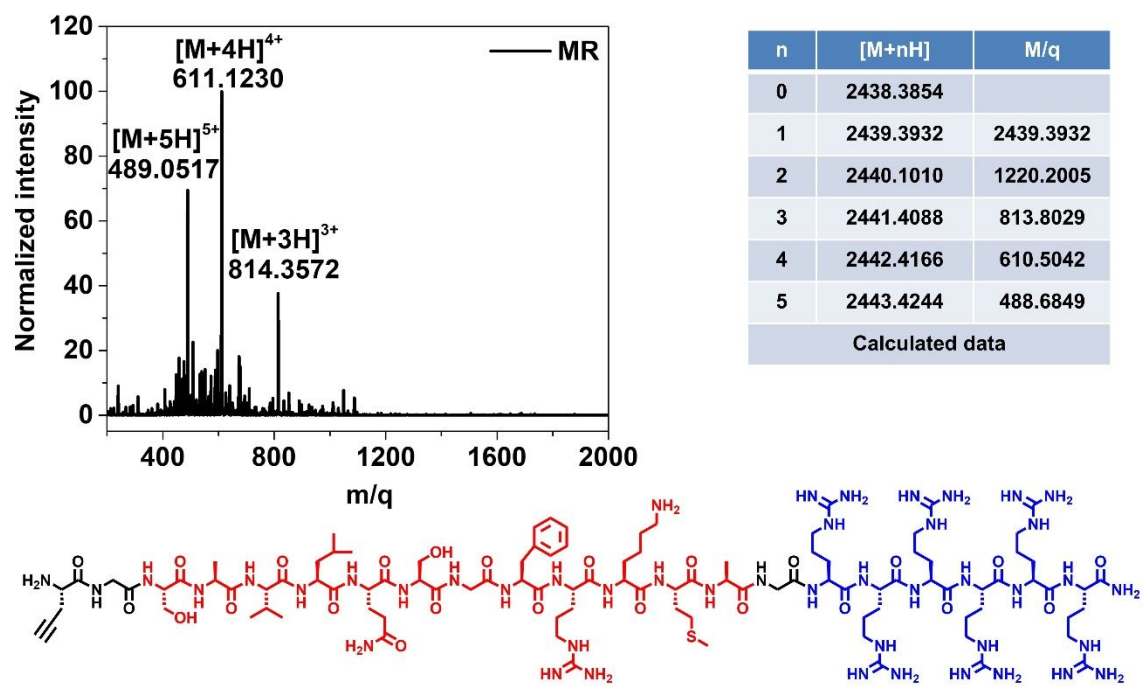

Figure S8. ESI-MS results of MR.

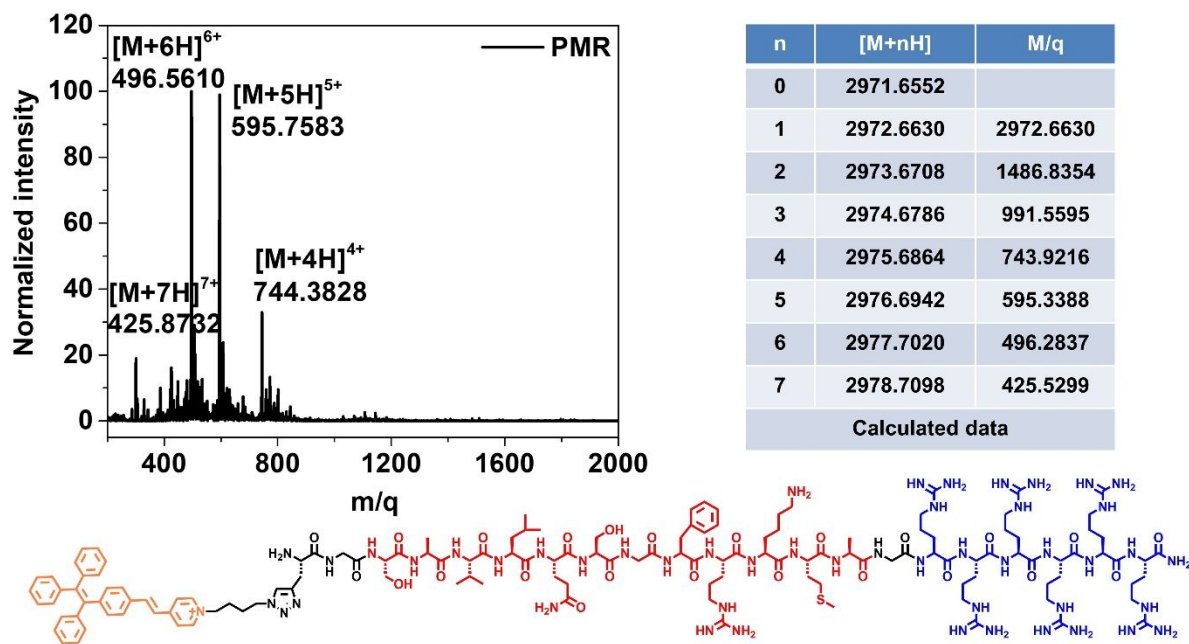

Figure S9. ESI-MS results of PMR.

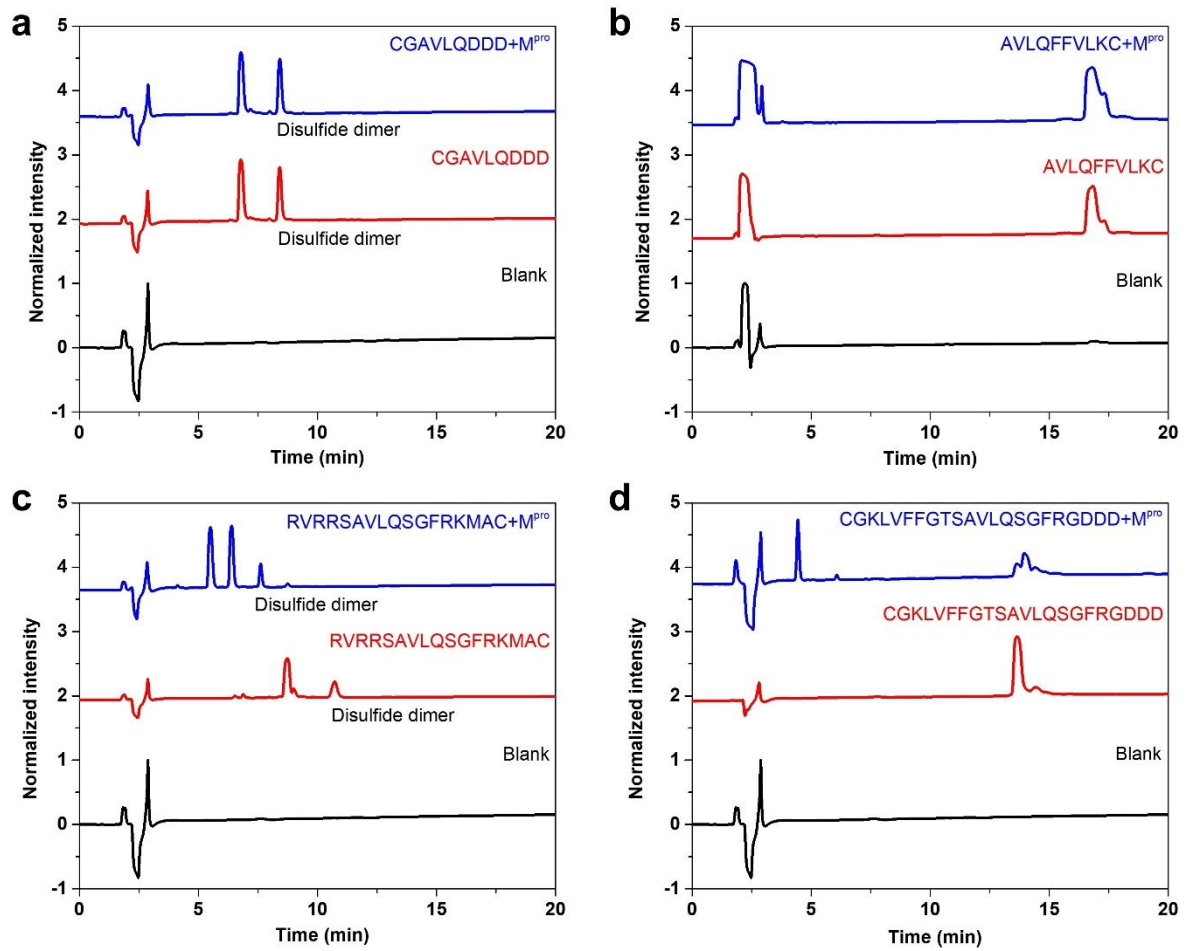

**Figure S10.** HPLC results of different peptides before and after incubation with  $M^{pro}$  showing that some AVLQ peptide sequence cannot be cleaved by  $M^{pro}$ . (a) CGAVLQDDD was not cleaved by  $M^{pro}$ . (b) AVLQFFVLKC was not cleaved by  $M^{pro}$ . (c) RVRRS AVLQSGFRKMAC was cleaved by  $M^{pro}$ . (d) CGKLVFFGTS AVLQSGFRGDDD was cleaved by  $M^{pro}$ .

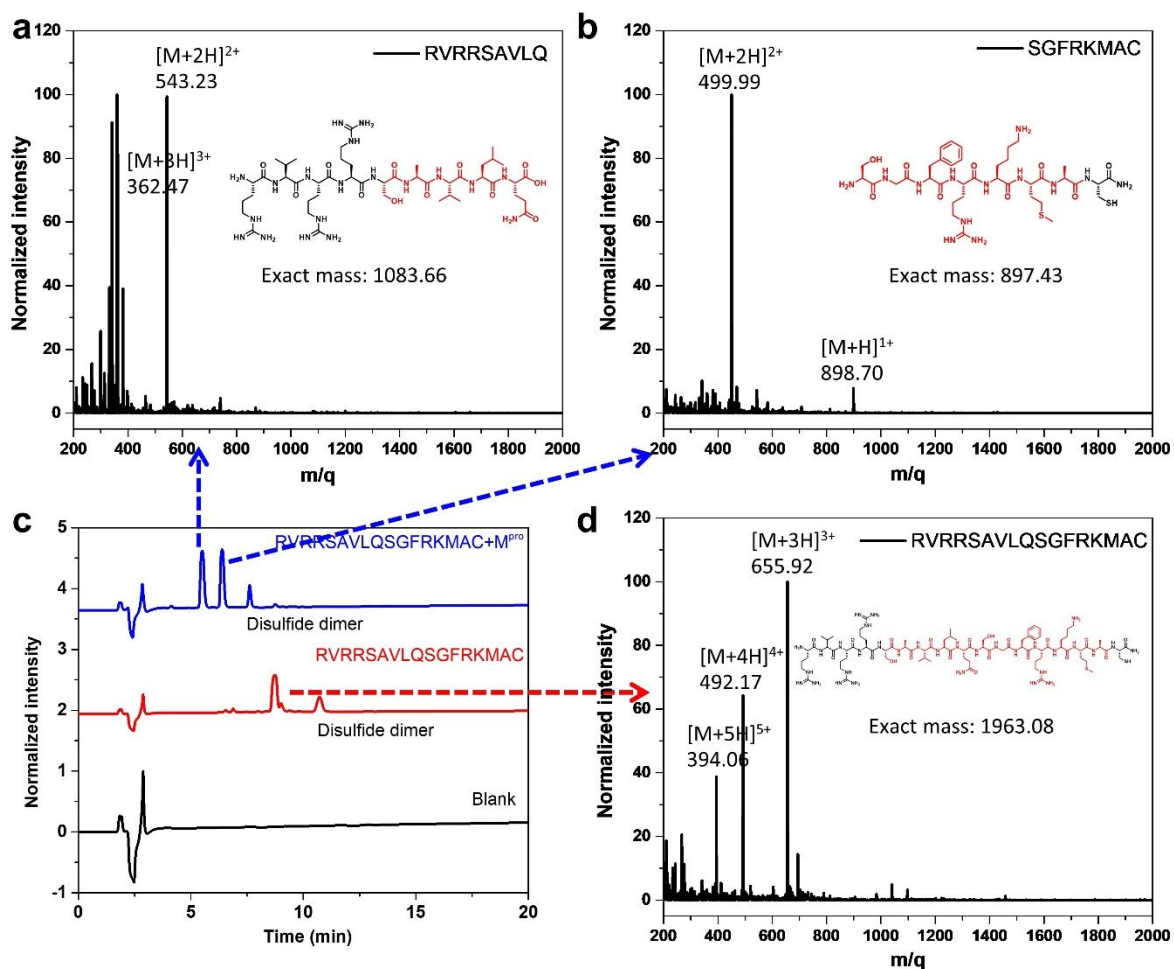

**Figure S11.** HPLC and ESI-MS results of compound RVRRSAVLQSGFRKMAC before and after incubation with  $M^{pro}$  showing that RVRRSAVLQSGFRKMAC can be cleaved by  $M^{pro}$  after AVLQ. (a) ESI-MS results of RVRRSAVLQ. (b) ESI-MS results of SGFRKMAC. (c) HPLC results of RVRRSAVLQSGFRKMAC before and after incubation with  $M^{pro}$ . (d) ESI-MS results of RVRRSAVLQSGFRKMAC.

vials containing the respective solutions under UV light (365 nm, 16 W)

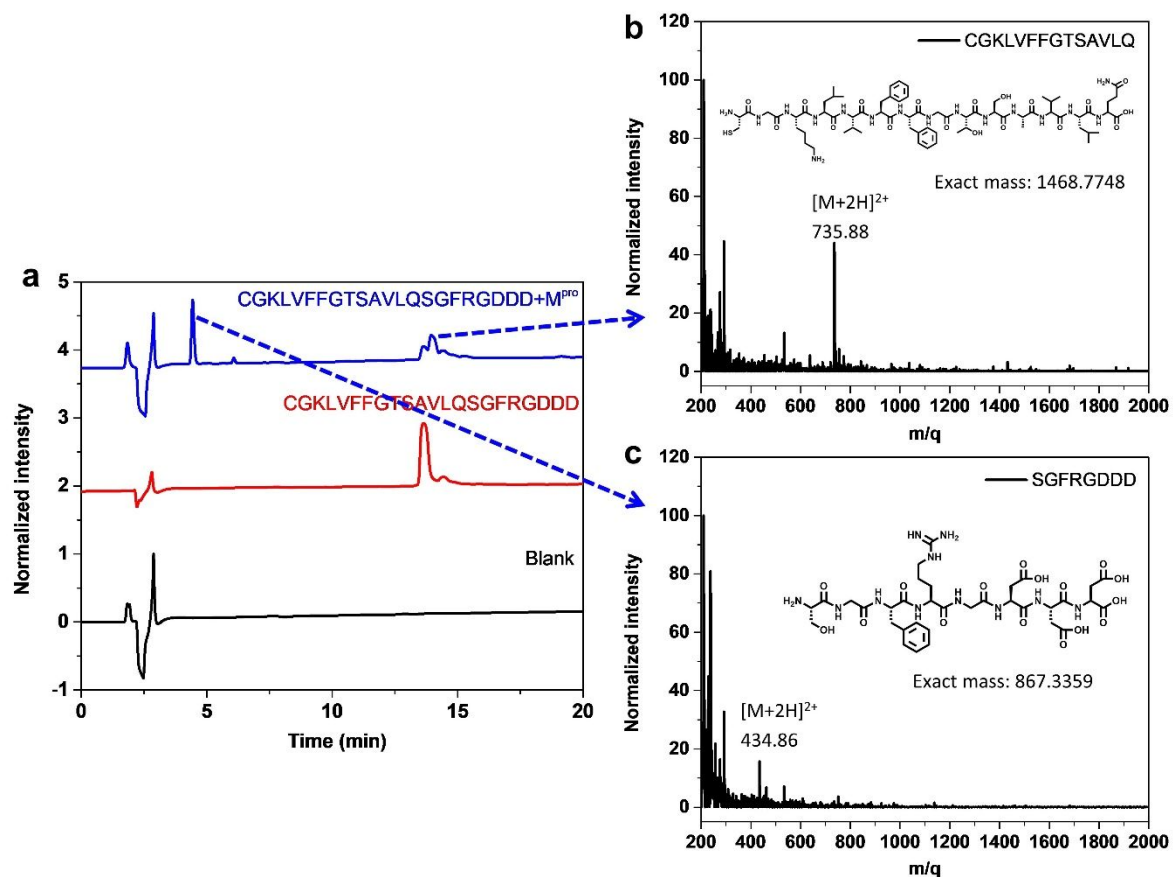

**Figure S12.** HPLC and ESI-MS results of compound CGKLVFFGTSAVLQSGFRGDDD before and after incubation with M<sup>pro</sup> showing that CGKLVFFGTSAVLQSGFRGDDD can be cleaved by M<sup>pro</sup> after AVLQ. (a) HPLC results of CGKLVFFGTSAVLQSGFRGDDD before and after incubation with M<sup>pro</sup>. (b) ESI-MS results of CGKLVFFGTSAVLQ. (c) ESI-MS results of SGFRGDDD.



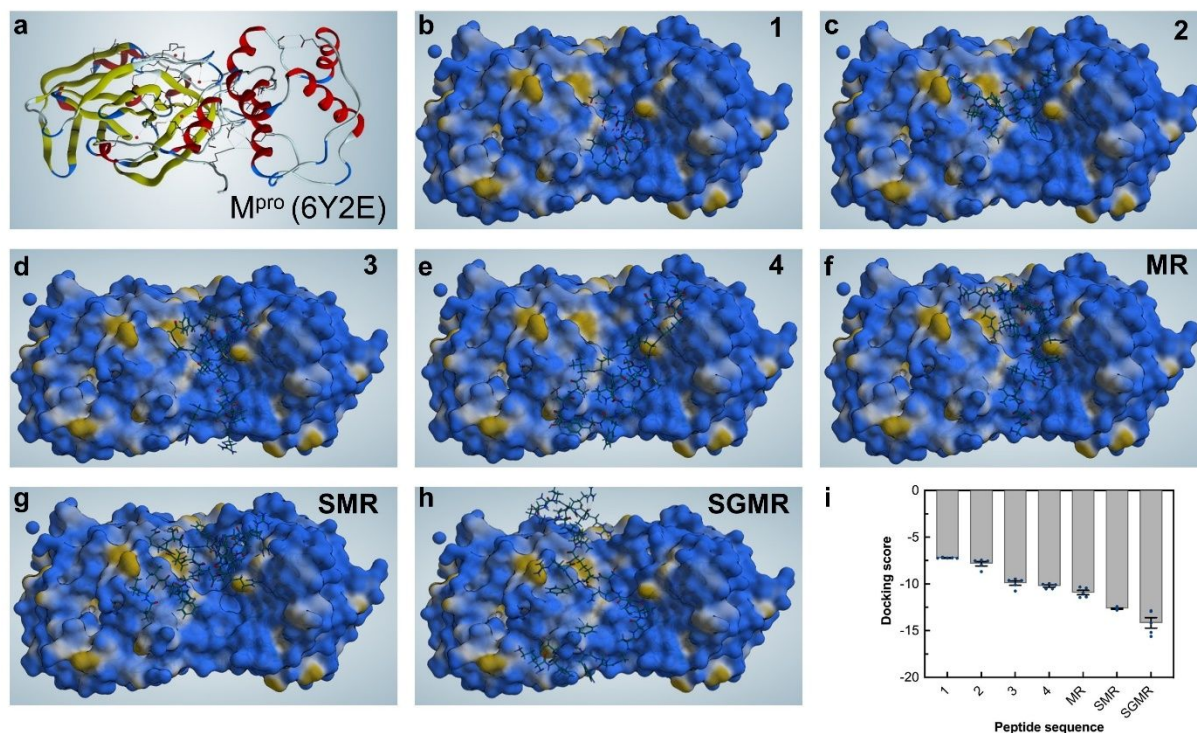

**Figure S13.** Molecular docking and theoretical calculation results of SARS-CoV-2 M<sup>pro</sup> (PDB code 6Y2E) in complex with the seven different peptides through a Molecular Operating Environment (MOE) software. (a) M<sup>pro</sup> 3D structure. (b) M<sup>pro</sup> with CGAVLQDDD (**1**). (c) M<sup>pro</sup> with AVLQFFVLKC (**2**). (d) M<sup>pro</sup> with RVRRAVLQSGFRKMAC (**3**). (e) M<sup>pro</sup> with CGKLVFFGTSAVLQ/SGFRGDDD (**4**). (f) M<sup>pro</sup> with (Pra)GSAVLQ/SGFRKMAGRRRRR (**MR**). (g) M<sup>pro</sup> with (Pra)KLVFFGSAVLQ/SGFRKMARRRRR (**SMR**). (h) M<sup>pro</sup> with (Pra)KLVFFGGGSAVLQ/SGFRKMAGGRRRRR (**SGMR**). The blue, yellow, and white represent hydrophilic, lipophilic, and neutral part of peptide in the M<sup>pro</sup>. (i) The docking scores of M<sup>pro</sup> with different peptides showing their enhanced binding abilities.

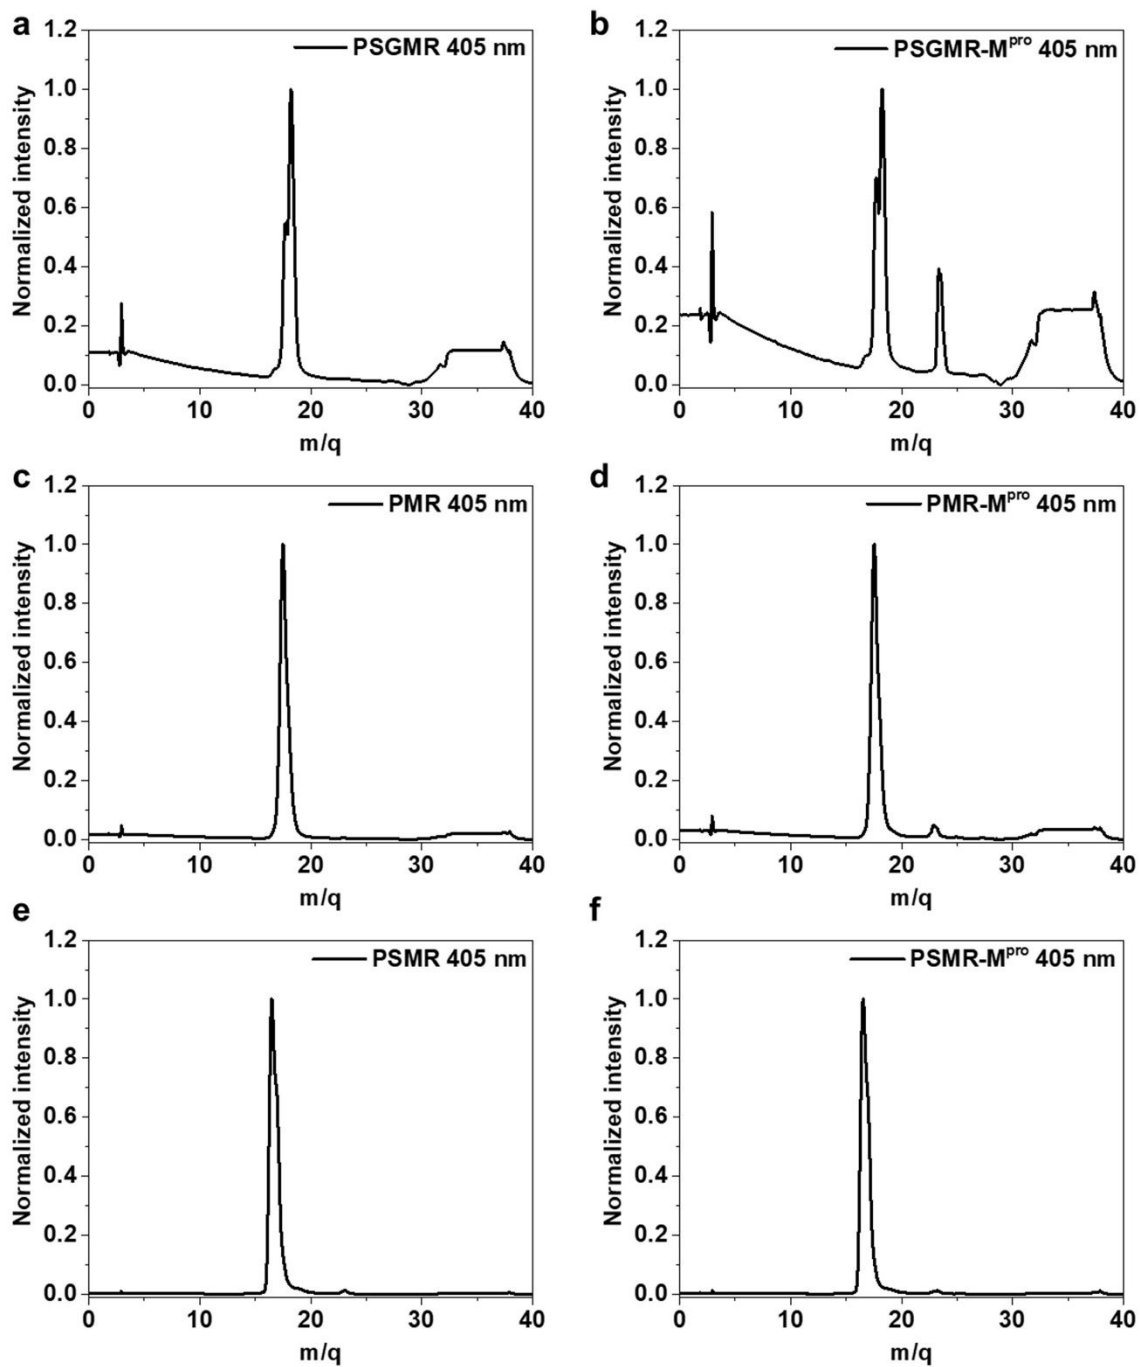

**Figure S14.** HPLC results of compounds PSGMR, PMR, and PSMR before and after incubation with M<sup>pro</sup> for 1 h showing that PSGMR and PMR not PSMR can be cleaved by M<sup>pro</sup>. (a-b) PSGMR. (c-d) PMR. (e-f) PSMR.

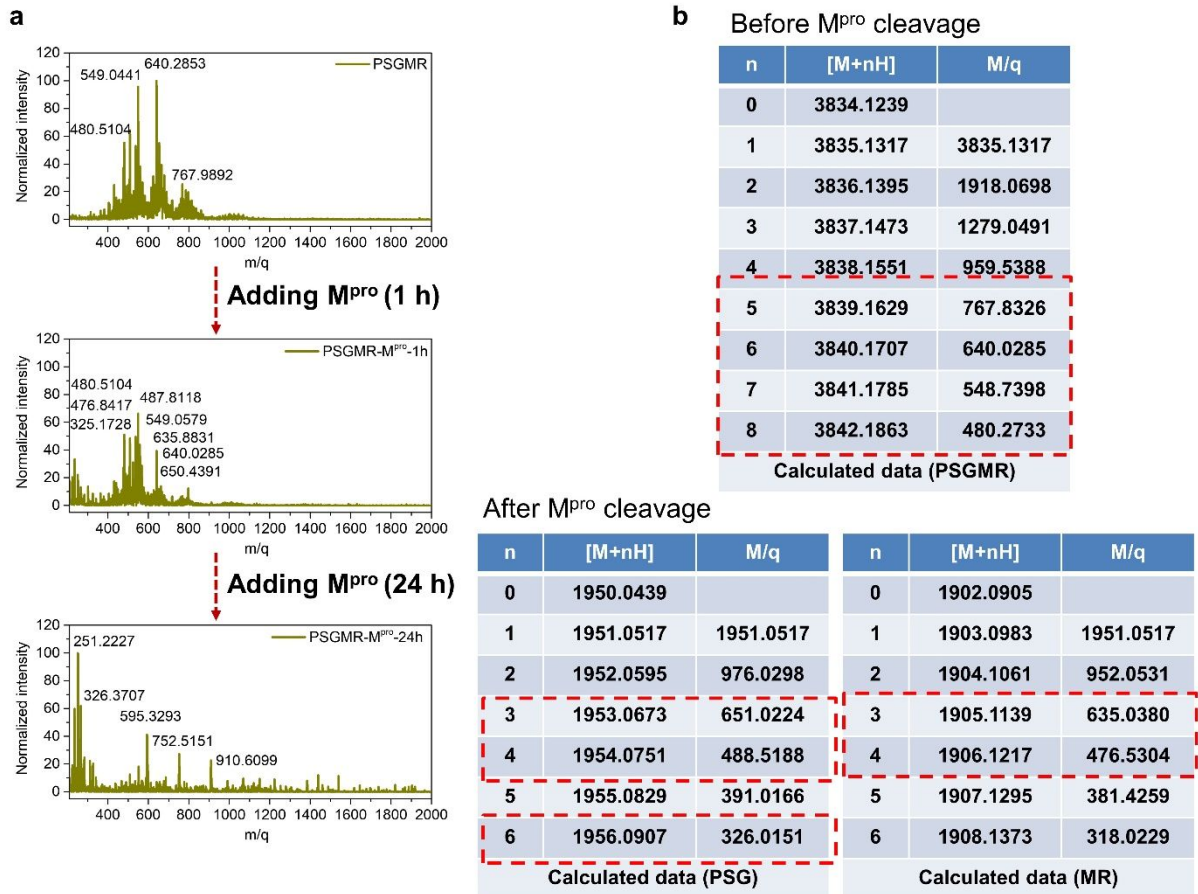

**Figure S15.** ESI-MS results of PSGMR before and after incubation with M<sup>pro</sup> for 1 h and 24 h showing that PSGMR can be cleaved by M<sup>pro</sup>. (a) ESI-MS. (b) The calculated data. The red dotted box includes the target molecular weight found.

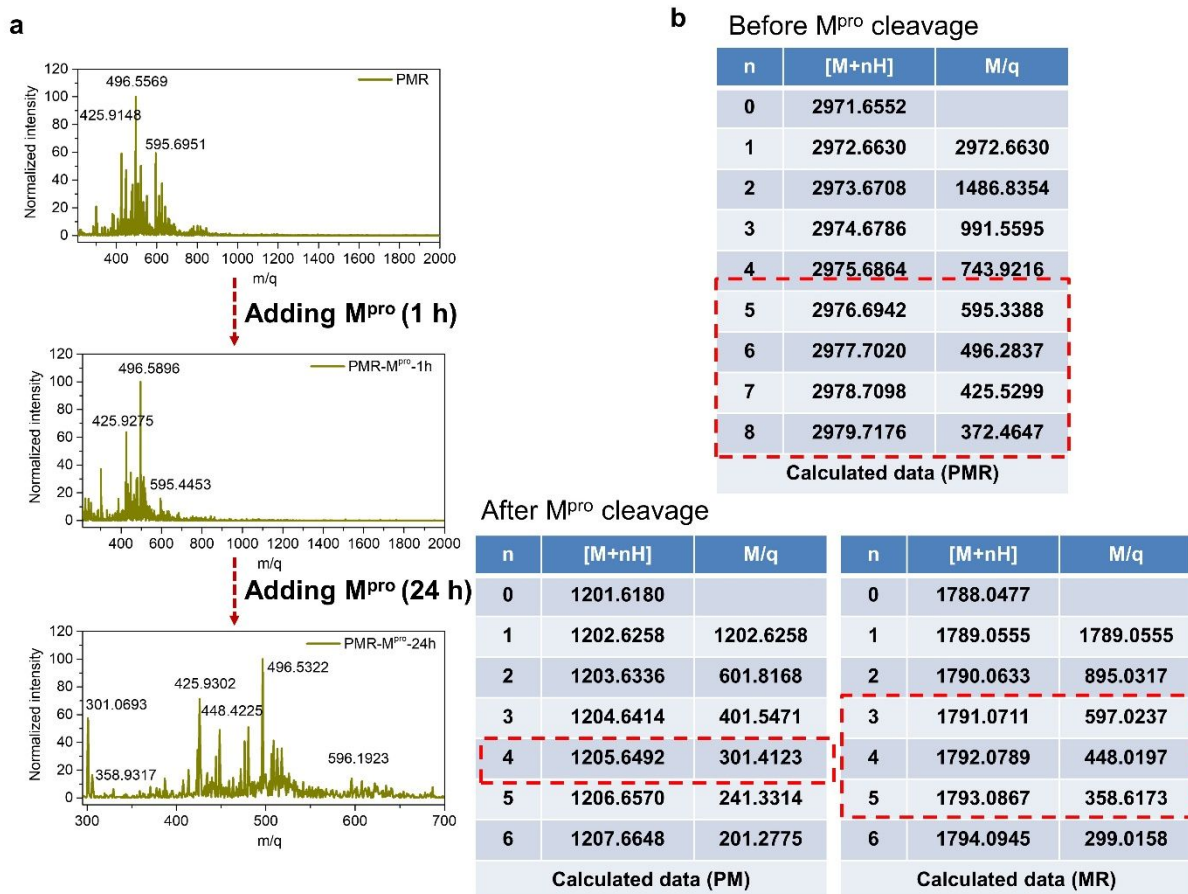

**Figure S16.** ESI-MS results of PMR before and after incubation with  $M^{\text{pro}}$  for 1 h and 24 h showing that PMR can be cleaved by  $M^{\text{pro}}$ . (a) ESI-MS. (b) The calculated data. The red dotted box includes the target molecular weight found.

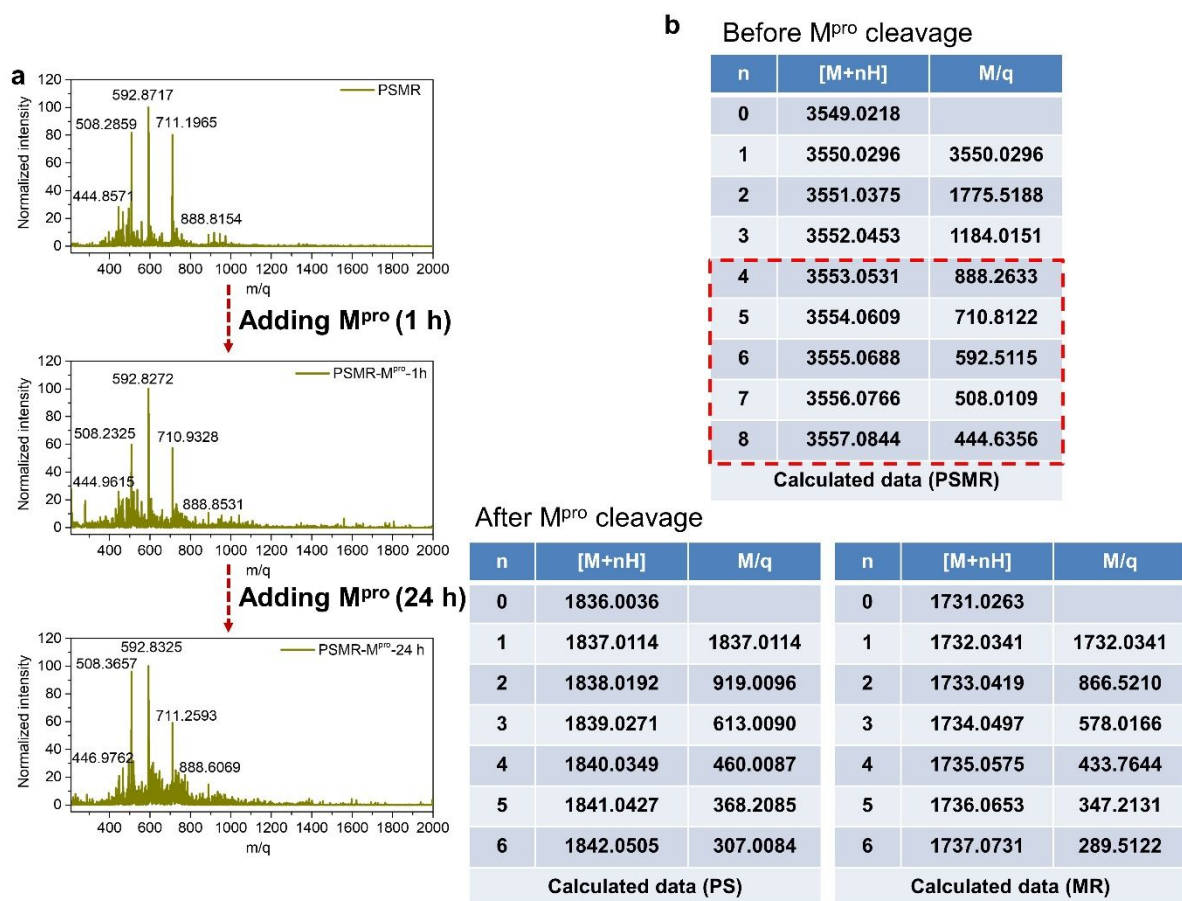

**Figure S17.** ESI-MS results of PSMR before and after incubation with  $M^{\text{pro}}$  for 1 h and 24 h showing that PSMR can be cleaved by  $M^{\text{pro}}$ . (a) ESI-MS. (b) The calculated data. The red dotted box includes the target molecular weight found.

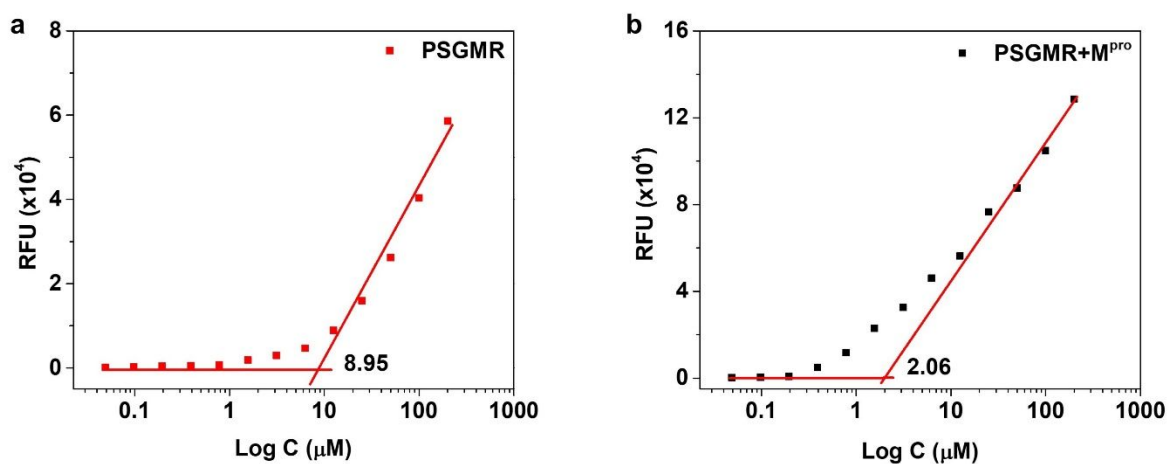

**Figure S18.** The Critical micelle concentrations (CMC) value of PSGMR and PSGMR after incubation with 200 nM M<sup>pro</sup>. The fluorescence intensity of PyTPE was analyzed as a function of the PSGMR concentration ( $\lambda_{Ex} = 405$  nm,  $\lambda_{Em} = 590$  nm).<sup>6</sup>

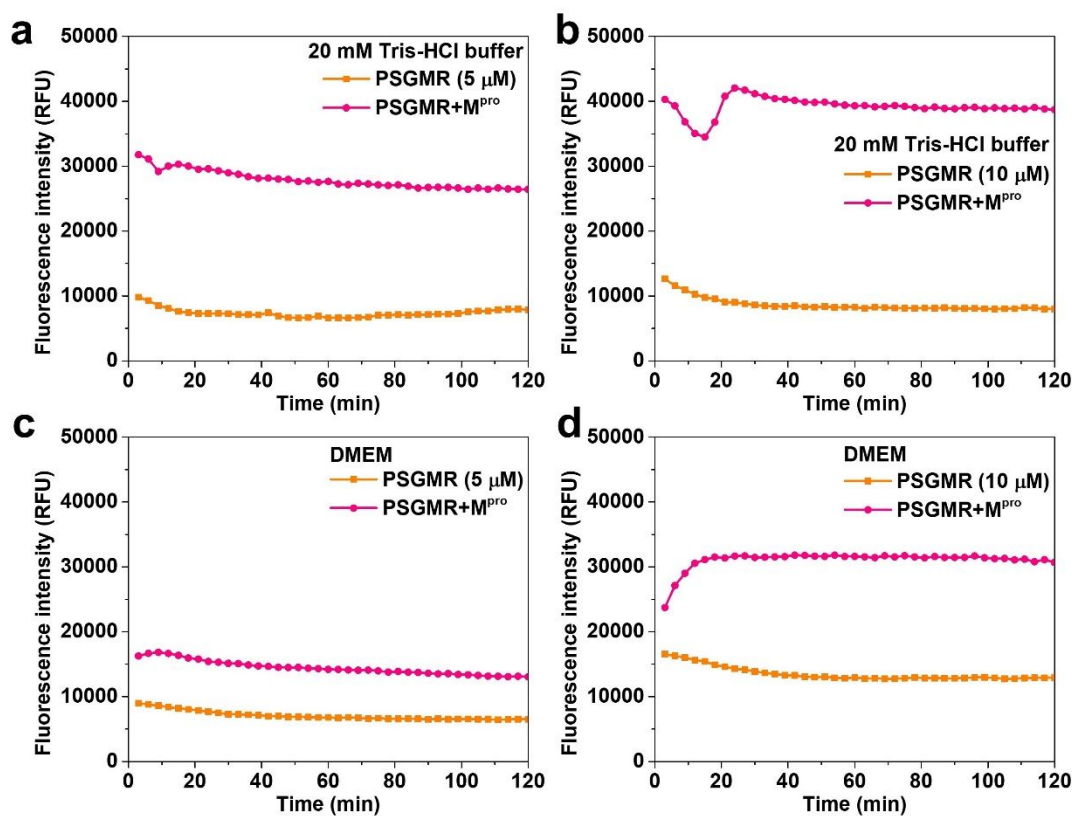

**Figure S19.** Time-dependent fluorescence spectra of (a, c) 5  $\mu$ M and (b, d) 10  $\mu$ M PSGMR incubation with  $M^{pro}$  in 20 mM Tris-HCl buffer and DMEM showing that high concentrations of PSGMR can aggregate easily with strong fluorescence both in 20 mM Tris-HCl buffer and DMEM.

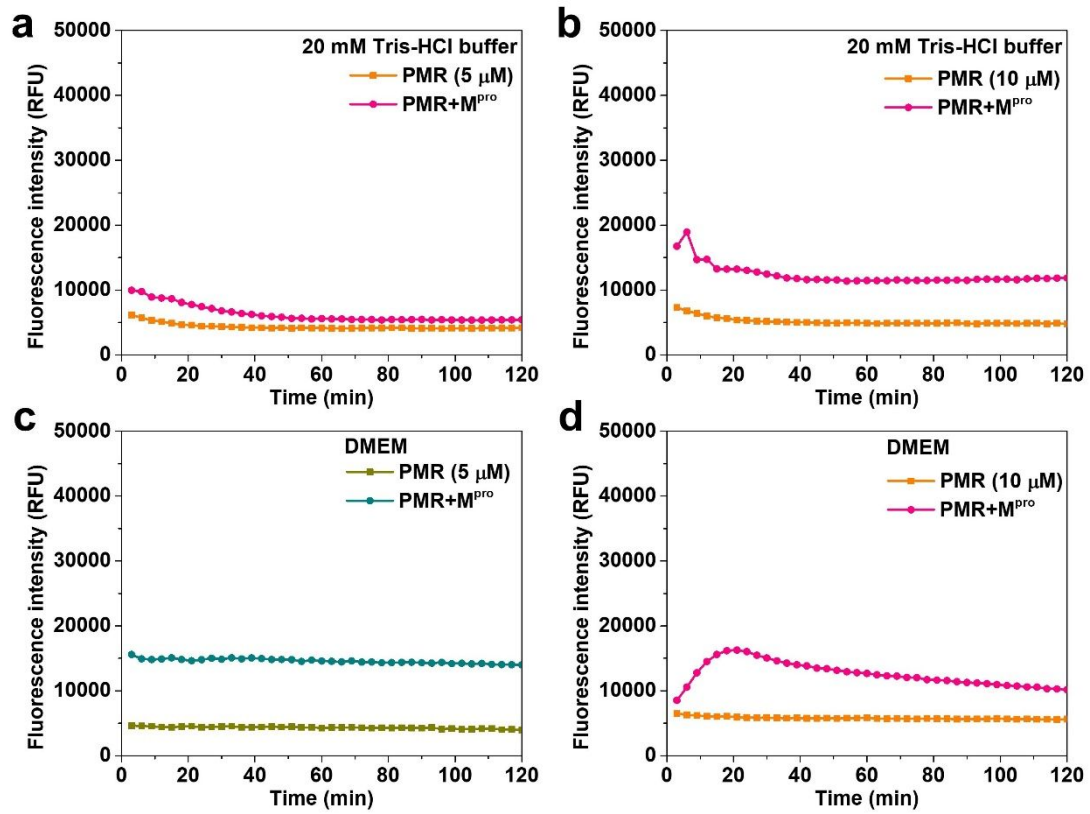

**Figure S20.** Time-dependent fluorescence spectra of (a, c) 5  $\mu$ M and (b, d) 10  $\mu$ M PMR incubation with M<sup>pro</sup> in 20 mM Tris-HCl buffer and DMEM showing that high concentrations of PMR can easily aggregate with strong fluorescence both in 20 mM Tris-HCl buffer and DMEM.



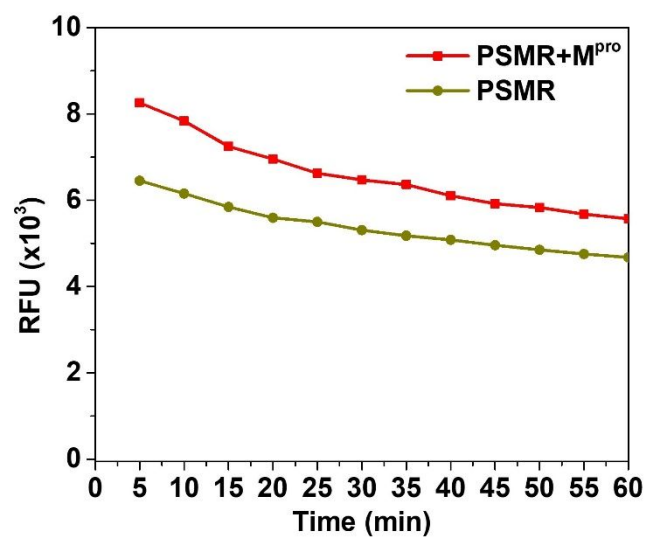

**Figure S21.** Time-dependent fluorescence spectra of 10  $\mu$ M PSMR incubation with M<sup>pro</sup> in 20 mM Tris-HCl buffer showing that PSMR cannot aggregate with weak fluorescence in 20 mM Tris-HCl buffer.

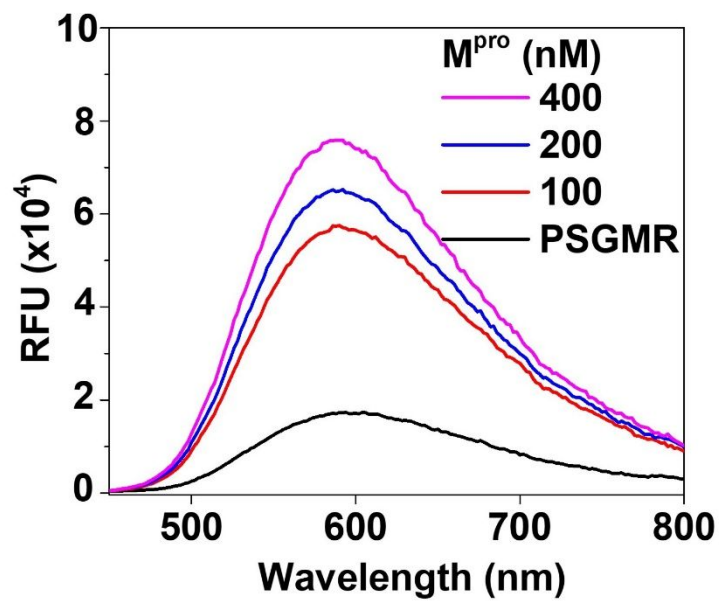

**Figure S22.** Fluorescence spectra of PSGMR with different concentration of M<sup>pro</sup> showed the fluorescence increase because of M<sup>pro</sup>.

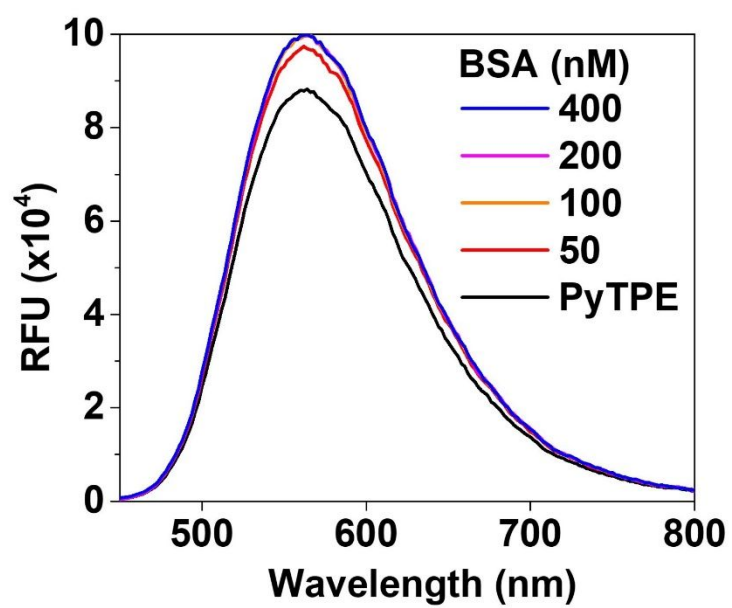

**Figure S23.** Fluorescence spectra of PyTPE with different concentration of BSA showed the fluorescence increase because of electrostatic interaction.

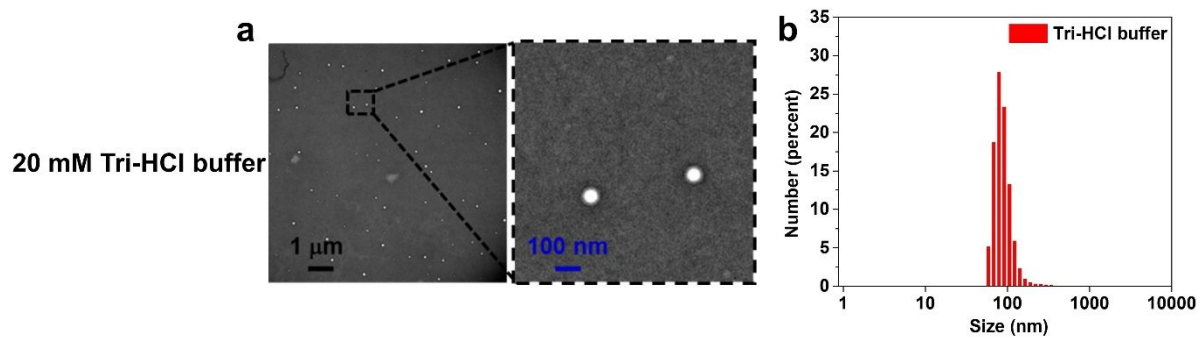

**Figure S24.** (a) Transmission electron microscope (TEM) images and (b) hydrodynamic size of 20 mM Tris-HCl buffer.

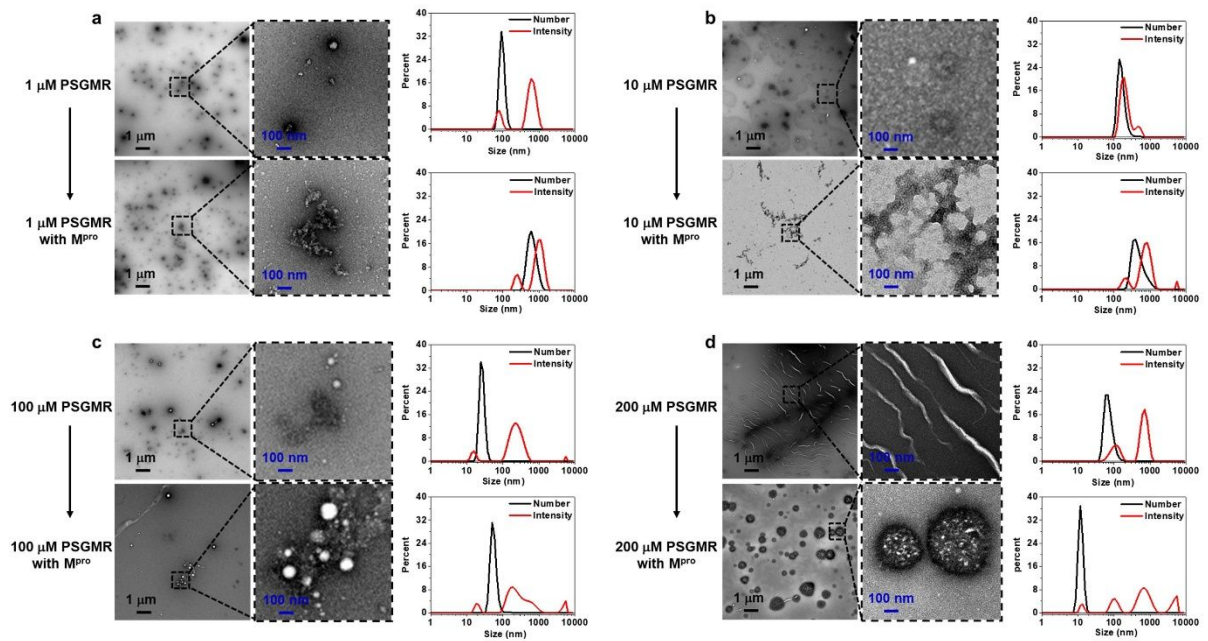

**Figure S25.** (a) Transmission electron microscope (TEM) images and (b) hydrodynamic sizes of 1  $\mu\text{M}$ , 10  $\mu\text{M}$ , 100  $\mu\text{M}$ , and 200  $\mu\text{M}$  PSGMR incubated with and without  $\text{M}^{\text{pro}}$  in 20 mM Tris-HCl buffer.

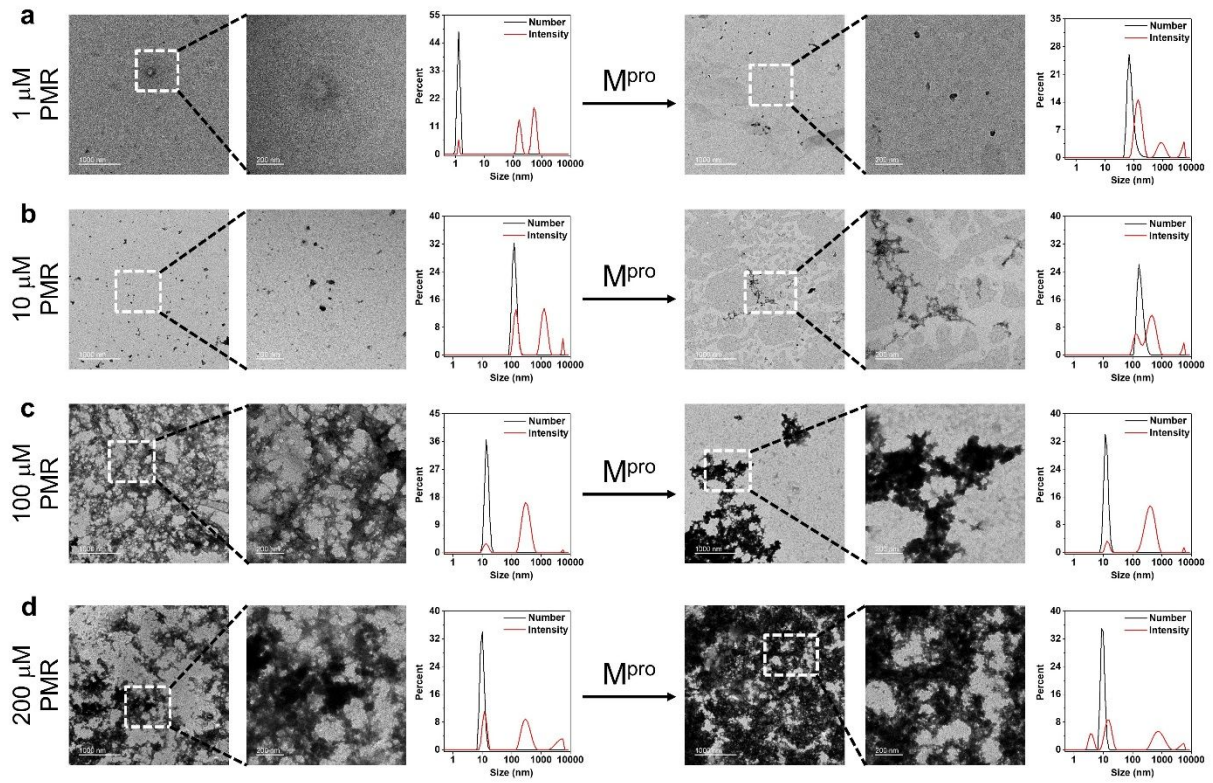

**Figure S26.** (a) Transmission electron microscope (TEM) images and (b) hydrodynamic sizes of 1  $\mu\text{M}$ , 10  $\mu\text{M}$ , 100  $\mu\text{M}$ , and 200  $\mu\text{M}$  PMR incubated with and without M<sup>pro</sup> in 20 mM Tris-HCl buffer.

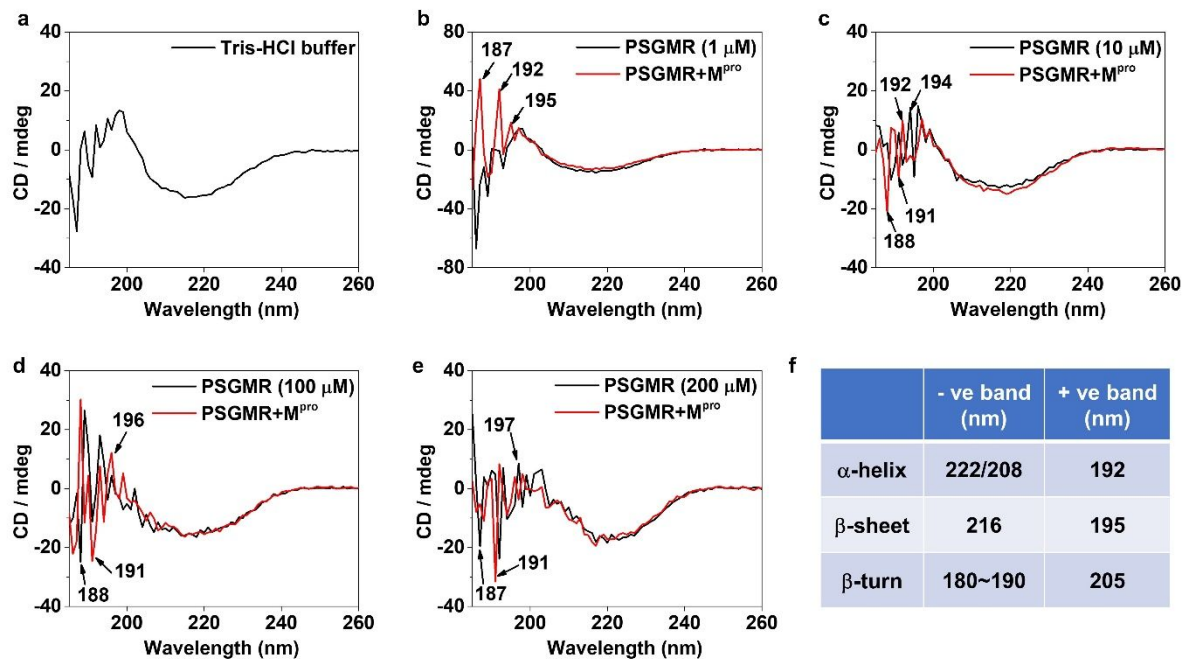

**Figure S27.** Circular dichroism (CD) spectra of (a) 20 mM Tris-HCl buffer and (b) 1 μM, (c) 10 μM, (d) 100 μM, and (e) 200 μM PSGMR before and after incubation with 200 nM M<sup>pro</sup>. (f) the peak values of α-helix, β-sheet, and β-turn structures in a protein molecule indicated by CD spectroscopy.

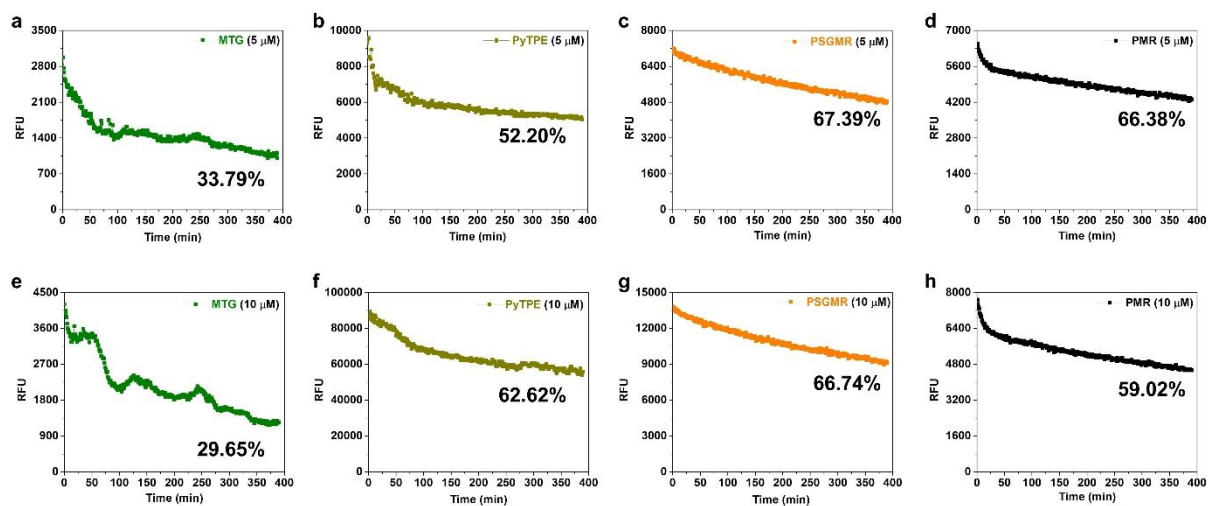

**Figure S28.** Photostability assay and relative remaining fluorescence intensity of different concentrations of a commercial dye Mito tracker green (MTG), PyTPE, PSGMR, and PMR after 6.5 h continuous scanning (scan every one minute), suggesting good photostability of AIEgens.



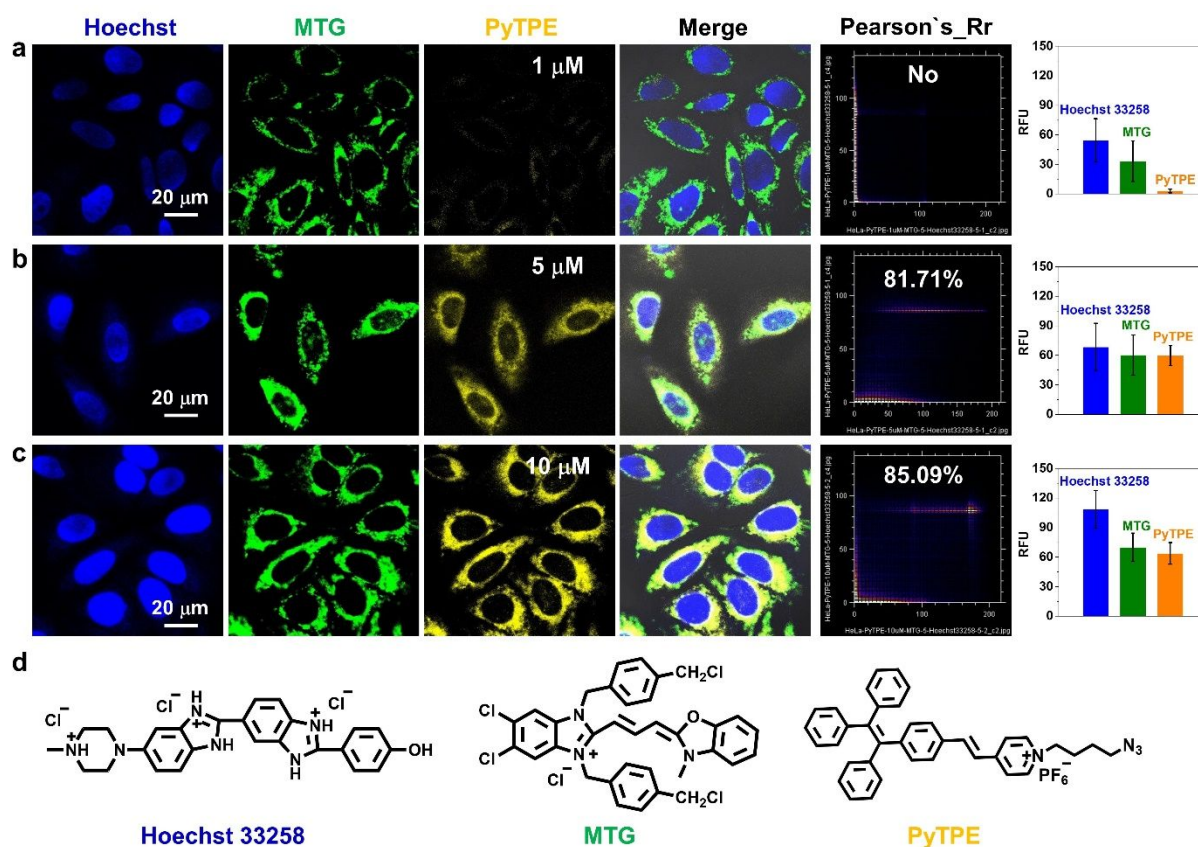

**Figure S29.** Confocal laser scanning microscopy (CLSM) images of HeLa cells incubated with Hoechst 33258, MTG, and PyTPE. The cell images, Pearson correlation coefficient of colocalization and the average fluorescence intensities of HeLa cells incubated with (a) 1  $\mu\text{M}$ , (b) 5  $\mu\text{M}$ , and (c) 10  $\mu\text{M}$  PyTPE as well as 5  $\mu\text{M}$  Hoechst 33258, and 1  $\mu\text{M}$  MTG for 3 h. (d) The chemical formula of Hoechst 33258, MTG and PyTPE. Scale bar = 20  $\mu\text{m}$ .

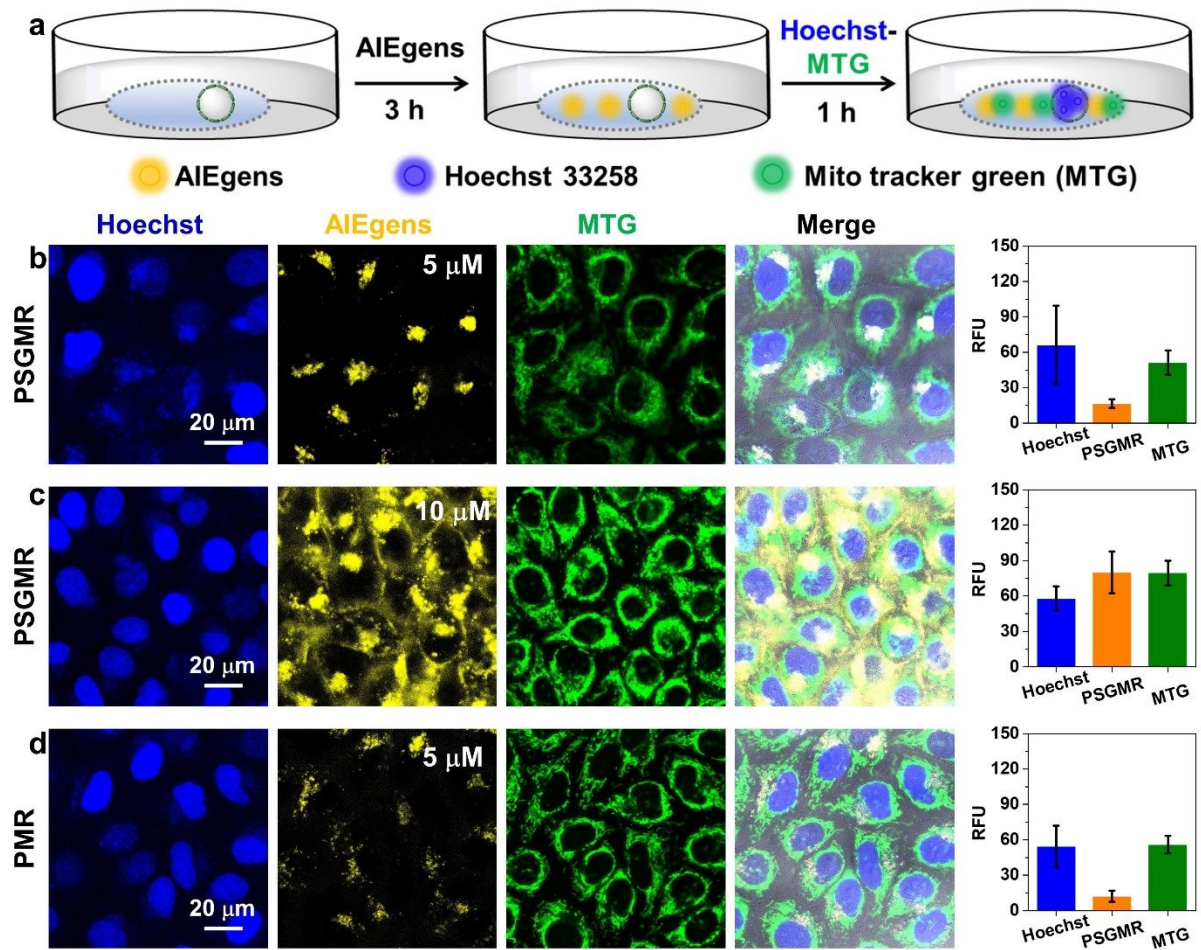

**Figure S30.** CLSM images and average fluorescence intensities of HeLa cells incubated with PyTPE, PSGMR, and PMR for 3h, then added Hoechst 33258 and MTG for 1h.

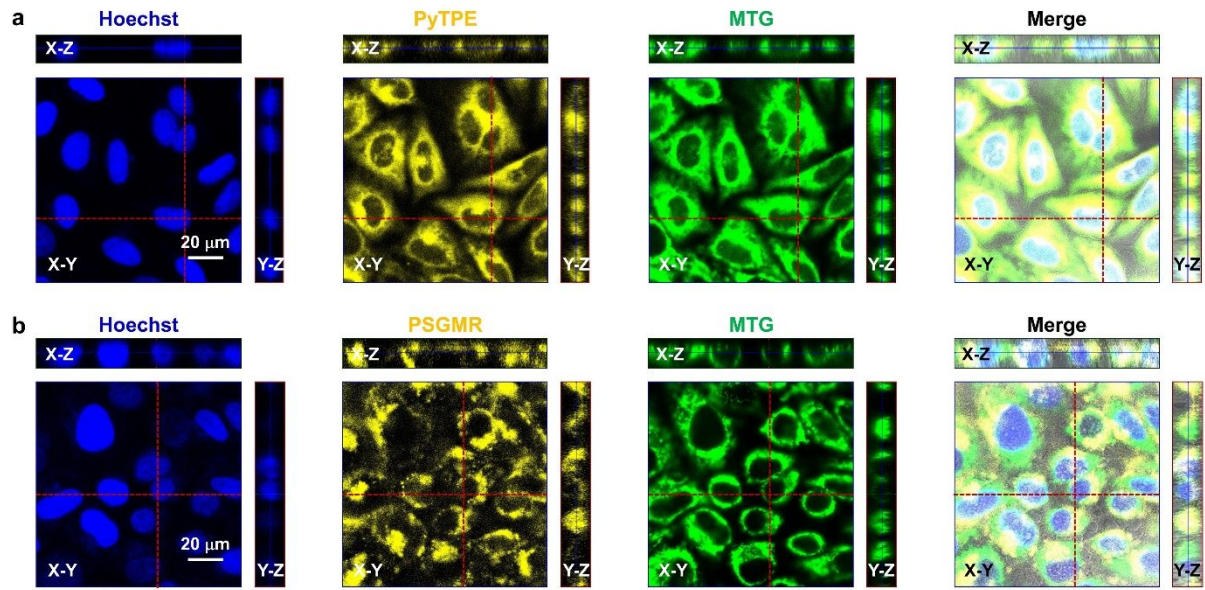

**Figure S31.** Z-stack images of HeLa cells incubated with (a) 5  $\mu\text{M}$  PyTPE and (b) 10  $\mu\text{M}$  PSGMR for 3h, then added Hoechst 33258 and MTG for 0.5h.

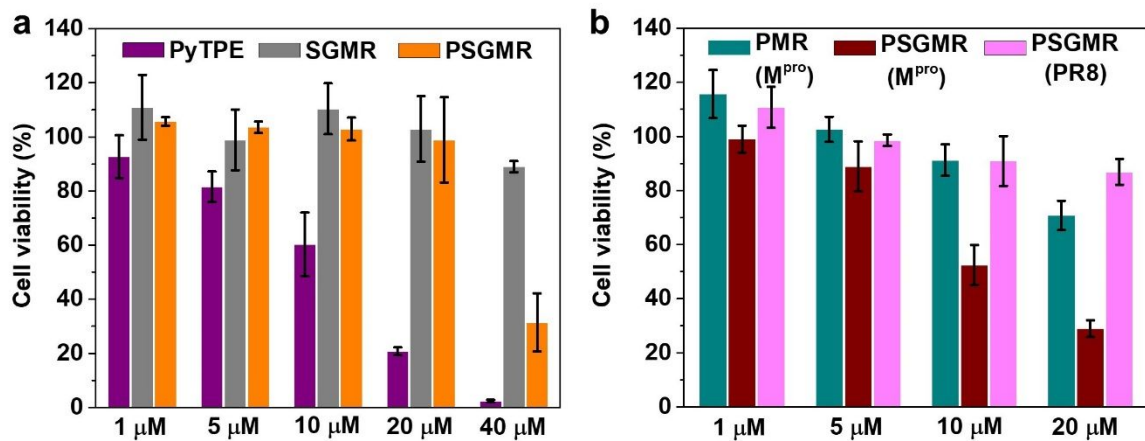

**Figure S32.** Metabolic activity of HEK 293T cells and plasmid transfected HEK 293T cells were studied with (a) (1 μM, 5 μM, 10 μM, 20 μM, and 40 μM) PyTPE, (1 μM, 5 μM, 10 μM, 20 μM, and 40 μM) SGMR, (1 μM, 5 μM, 10 μM, 20 μM, and 40 μM) PSGMR; (b) (1 μM, 5 μM, 10 μM, and 20 μM) PMR (M<sup>pro</sup> plasmid), (1 μM, 5 μM, 10 μM, and 20 μM) PSGMR (M<sup>pro</sup> plasmid), and (1 μM, 5 μM, 10 μM, and 20 μM) PSGMR (PR8 plasmid) for 48 h incubation using a fluorescence resazurin assay. The results show that the higher concentration of 10 μM of PyTPE and PSGMR (M<sup>pro</sup> plasmid) are obviously cytotoxic.

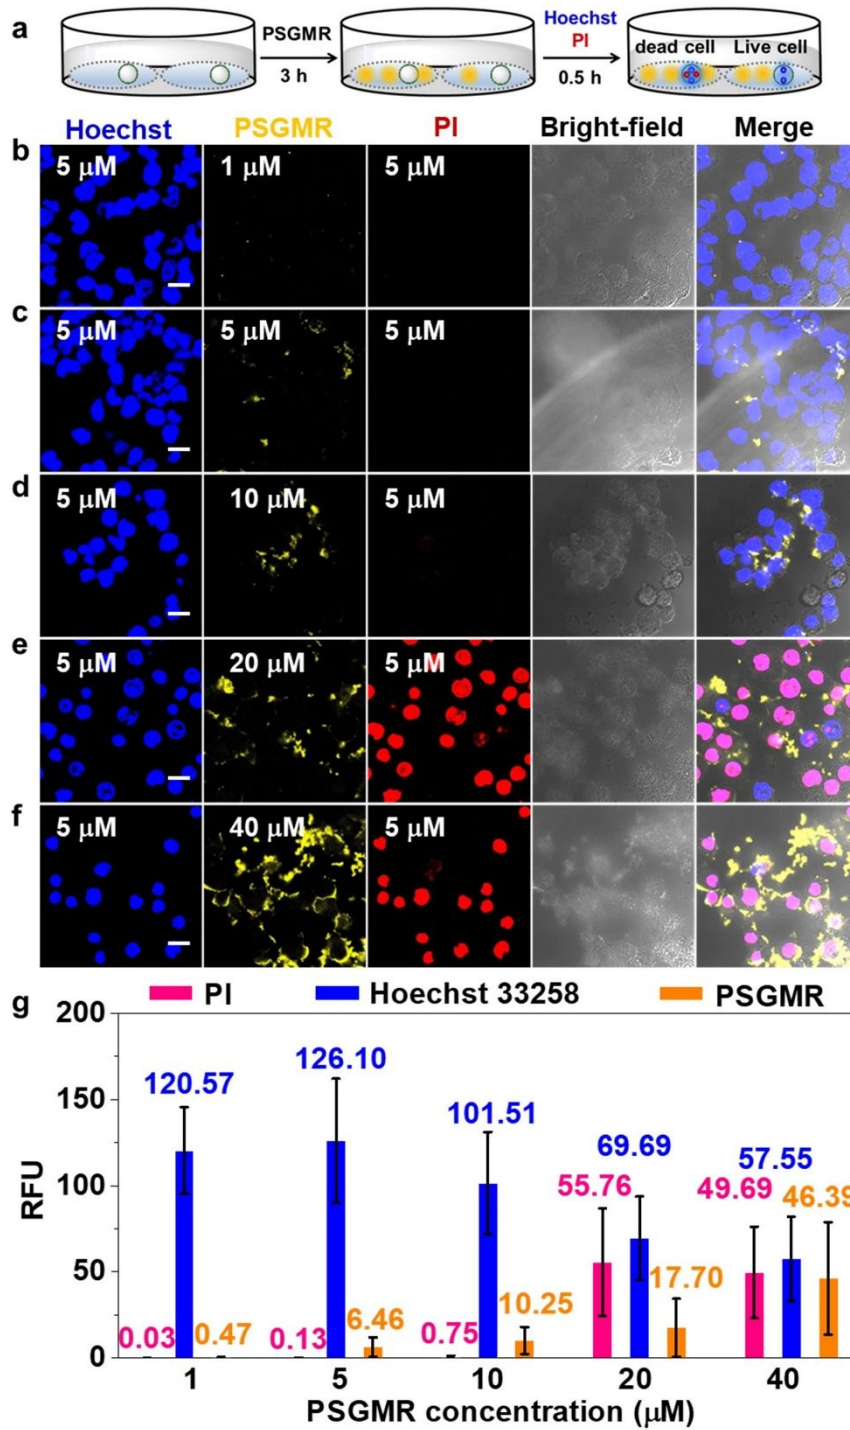

**Figure S33.** Confocal laser scanning microscopy (CLSM) images of HEK 293T cells incubated with Hoechst 33258, PSGMR, and PI. (a) The experimental scheme. Cell images of HEK 293T cells incubated with (b-f) 1  $\mu\text{M}$ , 5  $\mu\text{M}$ , 10  $\mu\text{M}$ , 20  $\mu\text{M}$ , and 40  $\mu\text{M}$  PSGMR, 5  $\mu\text{M}$  Hoechst 33258, and 5  $\mu\text{M}$  PI for 3 h, respectively. (g) The average fluorescence intensities of HEK 293T cells incubation with Hoechst 33258, PSGMR, and PI. Scale bar = 20  $\mu\text{m}$ .

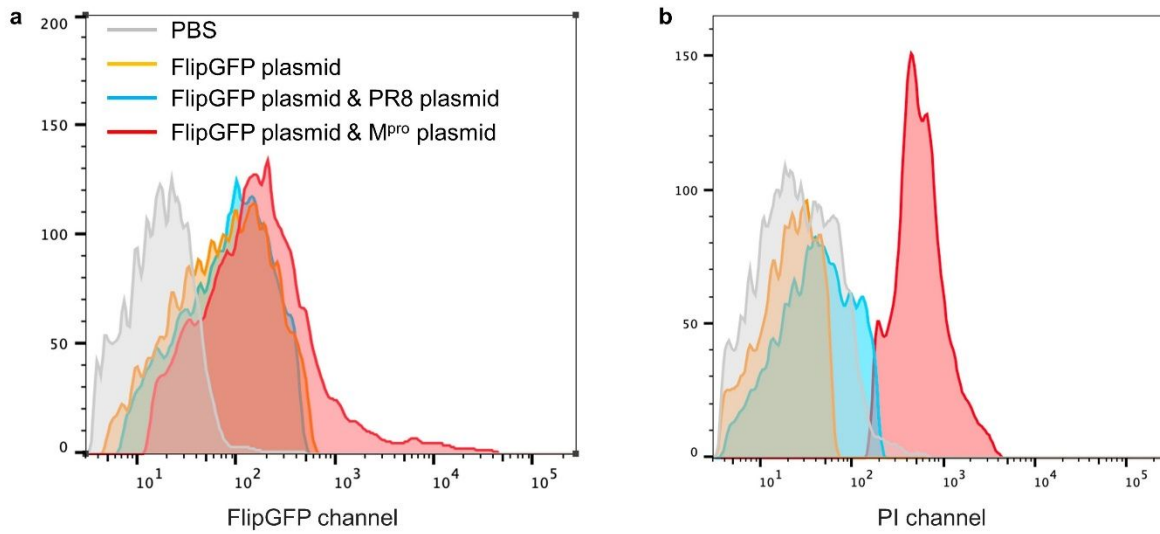

**Figure S34.** Flow cytometric analysis of FlipGFP plasmid, PR8 plasmid, and Mpro plasmid-transfected HEK 293T cells treated with 5  $\mu$ M PSGMR for 1h, and PI for 0.5h. (a) FlipGFP channel, (c) PI channel. The gray, yellow, blue, and red parts represent the cells treated with PBS; FlipGFP plasmid; FlipGFP plasmid & PR8 plasmid; and FlipGFP plasmid & M<sup>pro</sup> plasmid.

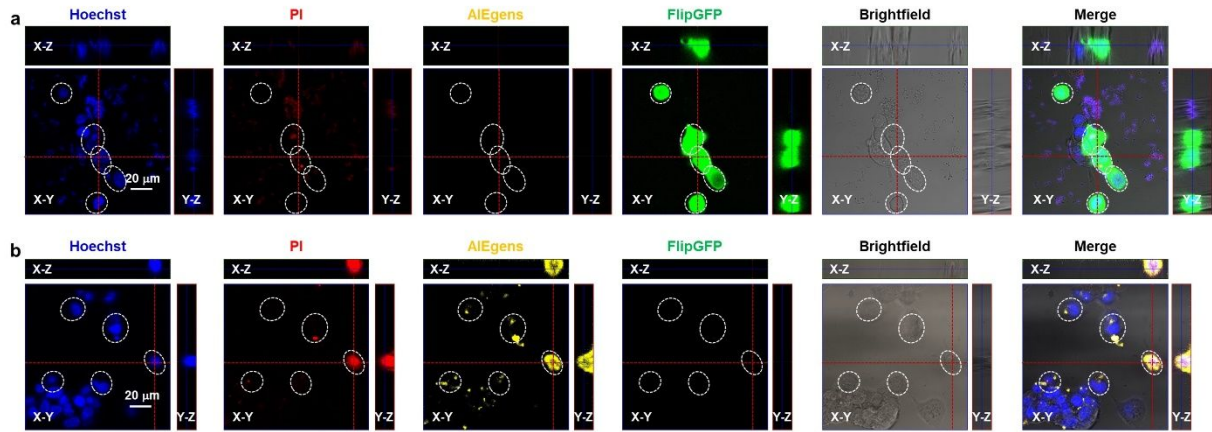

**Figure S35.** Z-stack images of M<sup>pro</sup> plasmid-transfected HEK 293T cells incubated with (a) FlipGFP plasmid and (b) 5 μM PSGMR for 1h, then added Hoechst 33258 and PI for 0.5h.

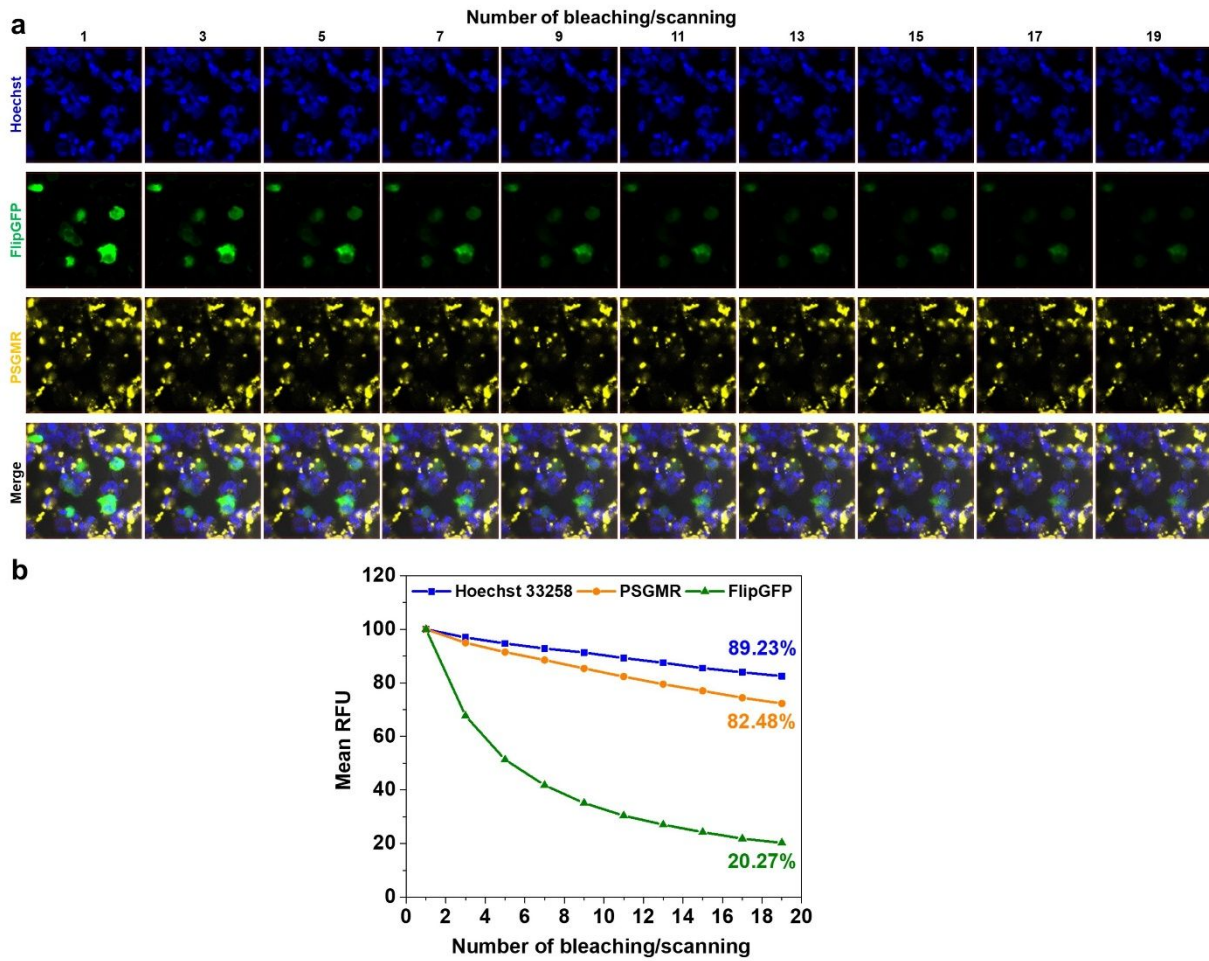

**Figure S36.** Photostability studies of M<sup>Pro</sup> plasmid- and FlipGFP plasmid-transfected HEK 293T cells incubated with 5  $\mu$ M PSGMR and 5  $\mu$ M Hoechst 33258 under an increasing number of bleaching events. (a) The corresponding CLSM images of HEK 293T cells and (b) the average fluorescence intensity changes of Hoechst 33258, PSGMR, and FlipGFP. bleaching wavelength: 405 nm and 488 nm; bleaching intensity: 100%.



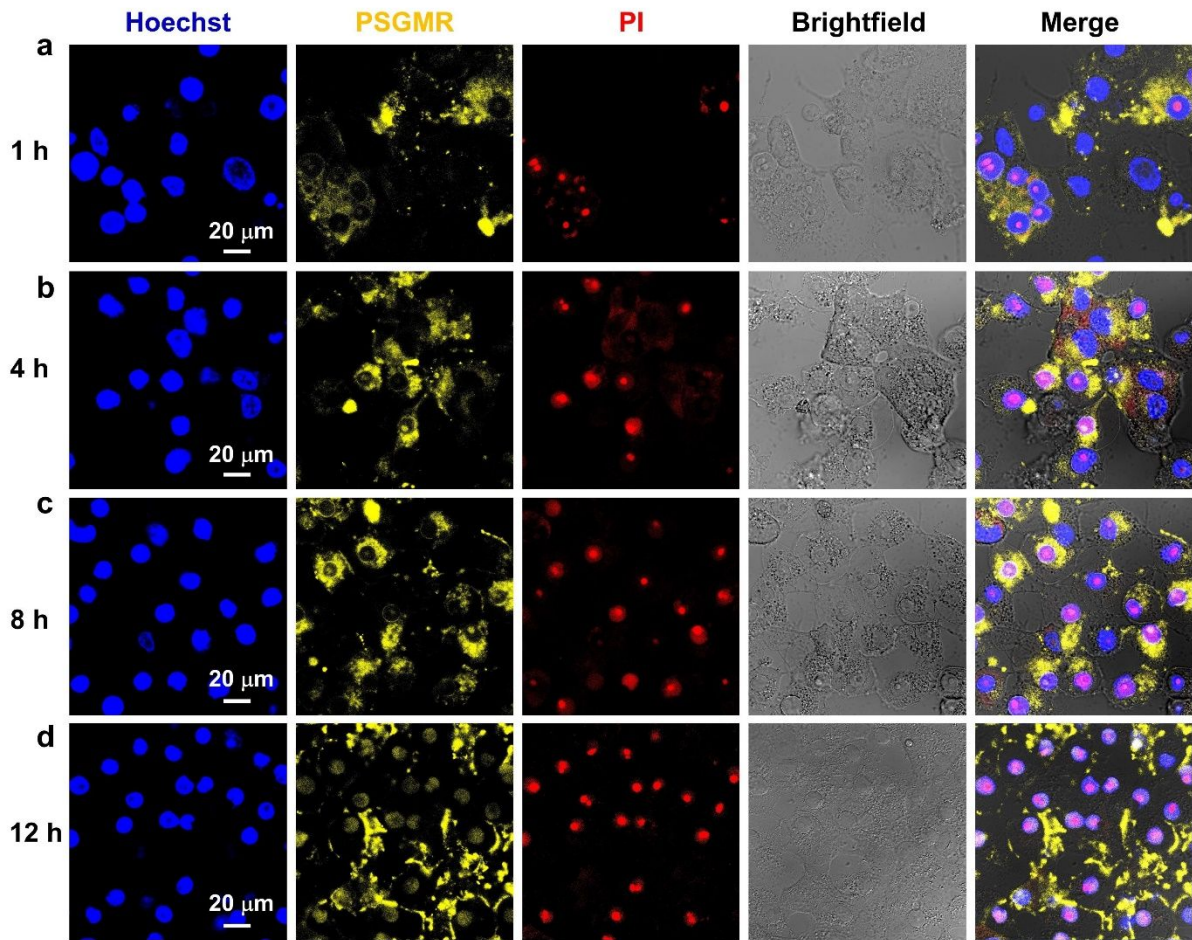

**Figure S37.** CLSM images of the  $M^{\text{pro}}$  plasmid transfected HEK 293T cells with 5  $\mu\text{M}$  PSGMR, 5  $\mu\text{M}$  Hoechst 33258, and 1  $\mu\text{M}$  MTG for different time. Scale bar = 20  $\mu\text{m}$ .

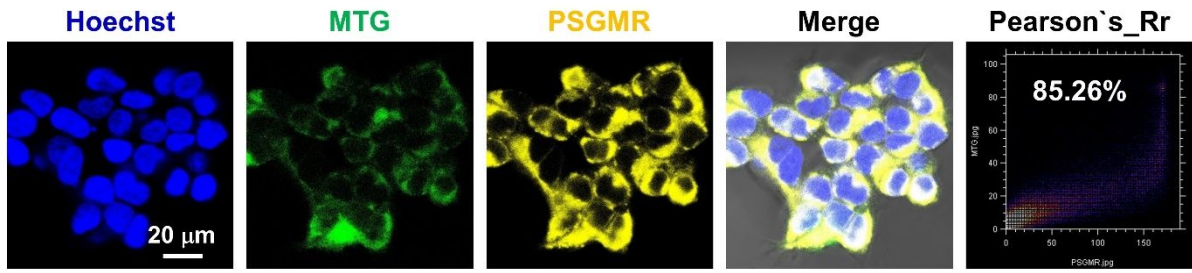

**Figure S38.** CLSM images and Pearson correlation coefficient of co-localization of the M<sup>pro</sup> plasmid transfected HEK 293T cells with 5 μM Hoechst 33258, 1 μM MTG and 10 μM PSGMR. Scale bar = 20 μm.

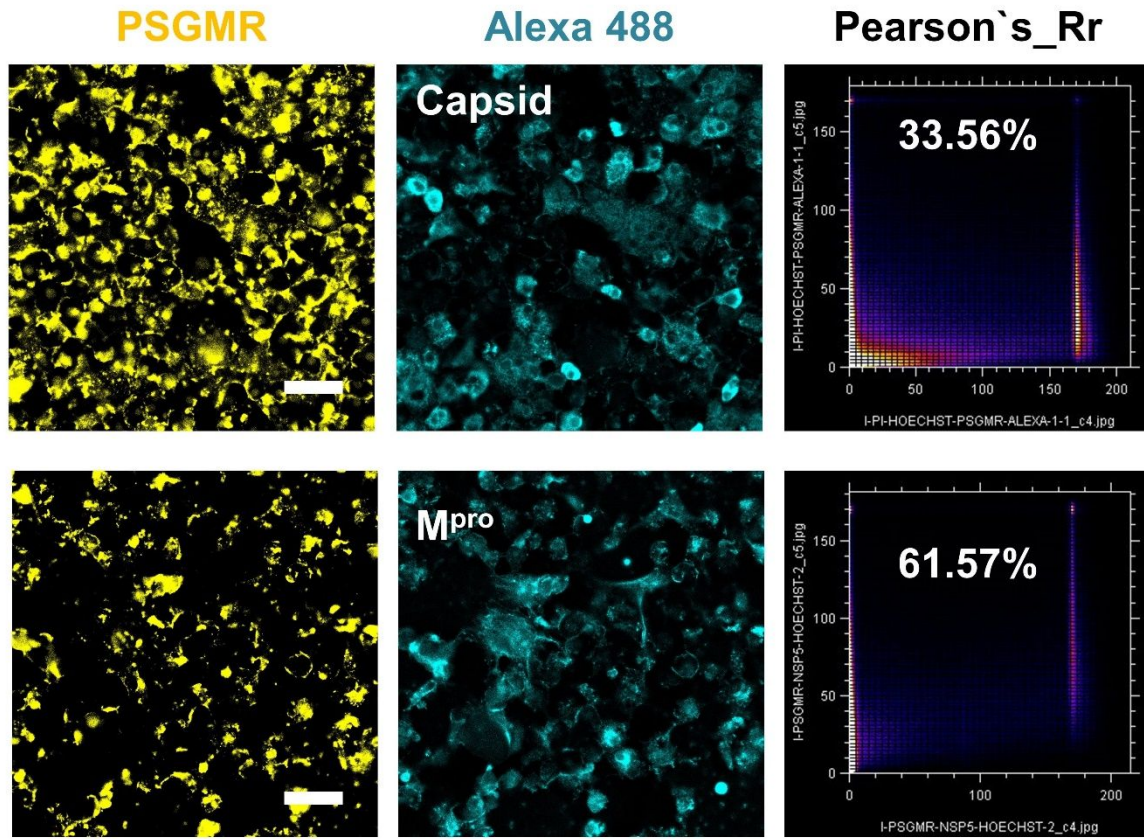

**Figure S39.** CLSM images and Pearson correlation coefficient of co-localization of the SARS-CoV-2-infected TMPRSS2-Vero cells with Alexa 488 (Capsid and M<sup>pro</sup>) and 5  $\mu$ M PSGMR. Scale bar = 50  $\mu$ m.

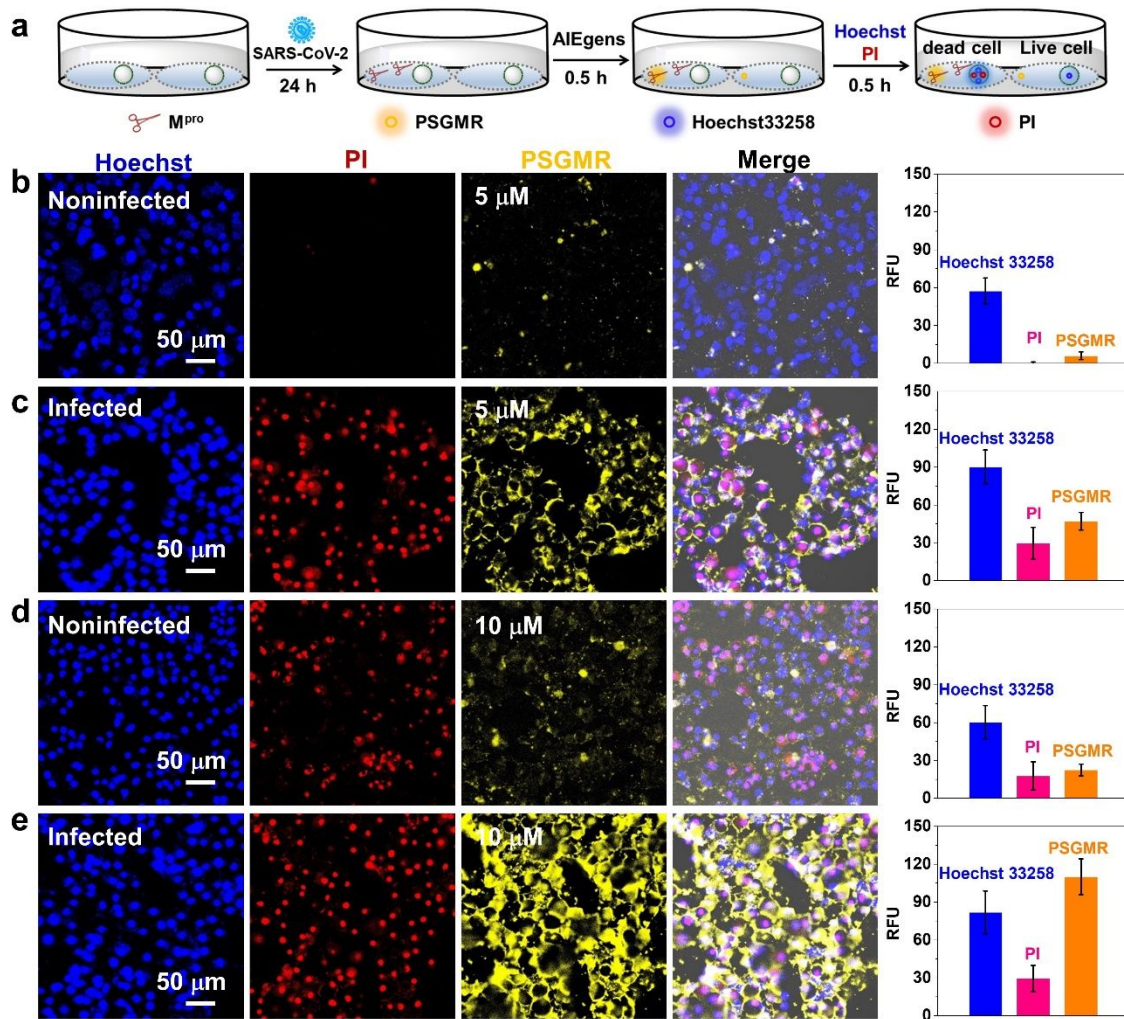

**Figure S40.** CLSM images and average fluorescence intensities of SARS-CoV-2 infected TMPRSS2-Vero cells incubation with Hoechst 33258, PI, and PSGMR. (a) The experimental scheme. Cell images and average fluorescence intensities of (b, d) noninfected TMPRSS2-Vero cells incubation with 5  $\mu$ M and 10  $\mu$ M PSGMR, and (c, e) SARS-CoV-2 infected TMPRSS2-Vero cells incubation with 5  $\mu$ M and 10  $\mu$ M PSGMR. Scale bar = 50  $\mu$ m.

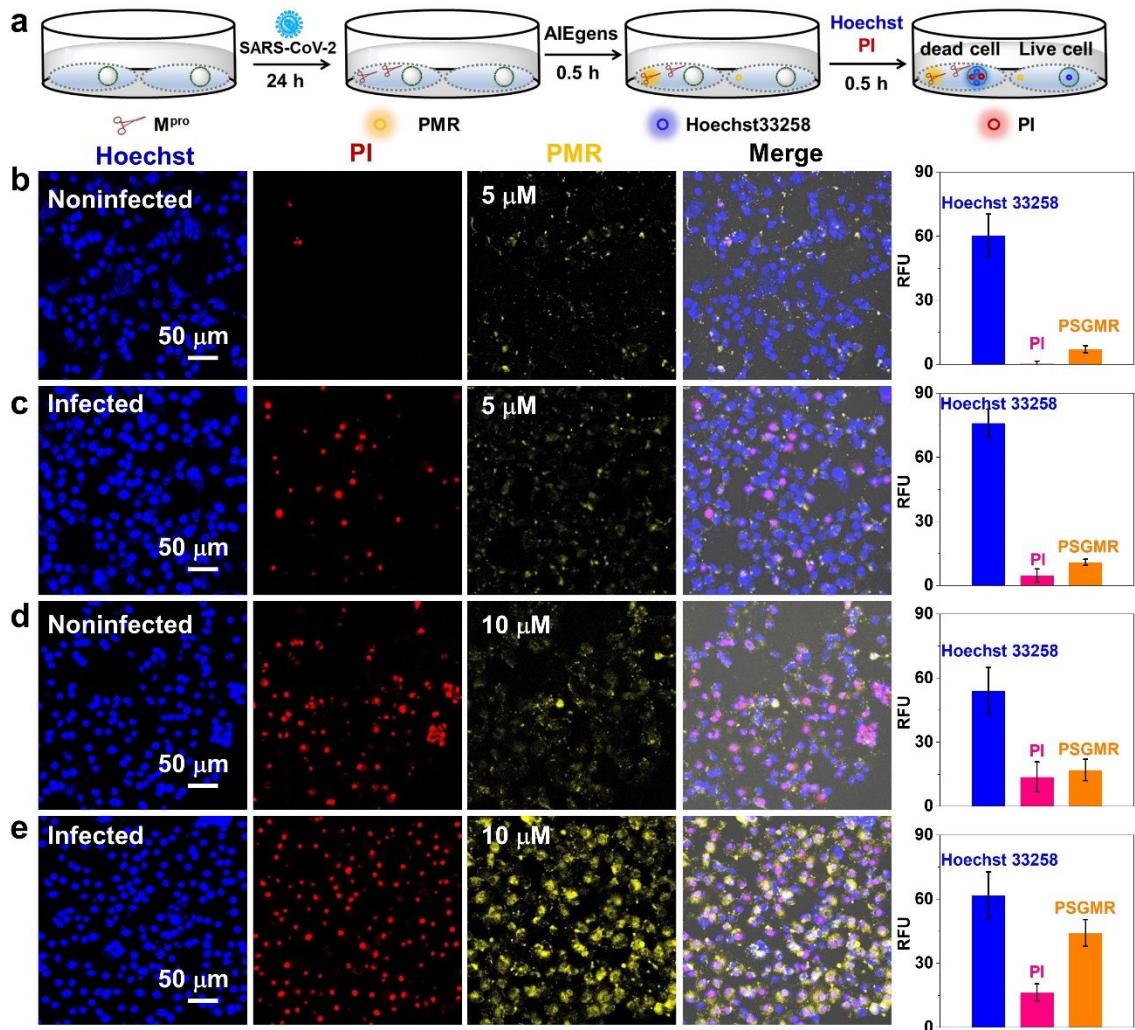

**Figure S41.** CLSM images and average fluorescence intensities of SARS-CoV-2 infected TMPRSS2-Vero cells incubation with Hoechst 33258, PI, and PMR. (a) The experimental scheme. Cell images and average fluorescence intensities of (b, d) noninfected TMPRSS2-Vero cells incubation with 5  $\mu\text{M}$  and 10  $\mu\text{M}$  PMR, and (c, e) SARS-CoV-2 infected TMPRSS2-Vero cells incubation with 5  $\mu\text{M}$  and 10  $\mu\text{M}$  PMR. Scale bar = 50  $\mu\text{m}$ .

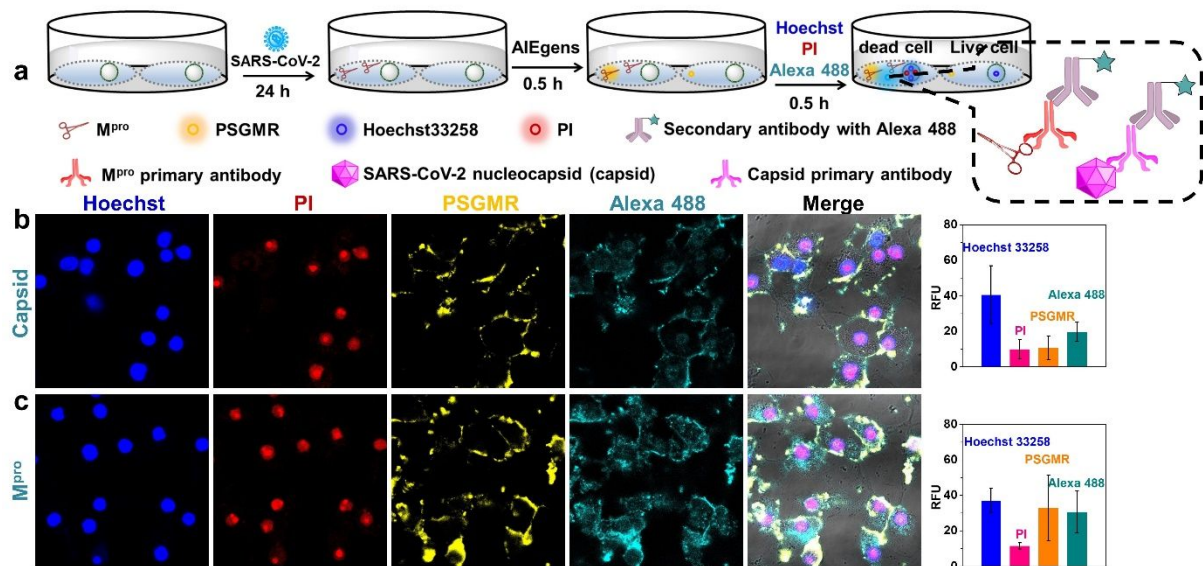

**Figure S42.** CLSM images and average fluorescence intensities of SARS-CoV-2 infected TMPRSS2-Vero cells incubation with Hoechst 33258, PI, PSGMR, anti-SARS-CoV-2 nucleocapsid (Capsid) primary antibody, anti-SARS-CoV-2  $M^{pro}$  primary antibody, and AlexaFluor 488-labeled secondary antibody (Alexa 488). (a) The experimental scheme. Cell images and average fluorescence intensities of SARS-CoV-2 infected TMPRSS2-Vero cells incubated with 5  $\mu$ M PSGMR, (b) anti-SARS-CoV-2 Capsid primary antibody/Alexa 488, and (c) anti-SARS-CoV-2  $M^{pro}$  primary antibody/Alexa 488. Scale bar = 20  $\mu$ m.

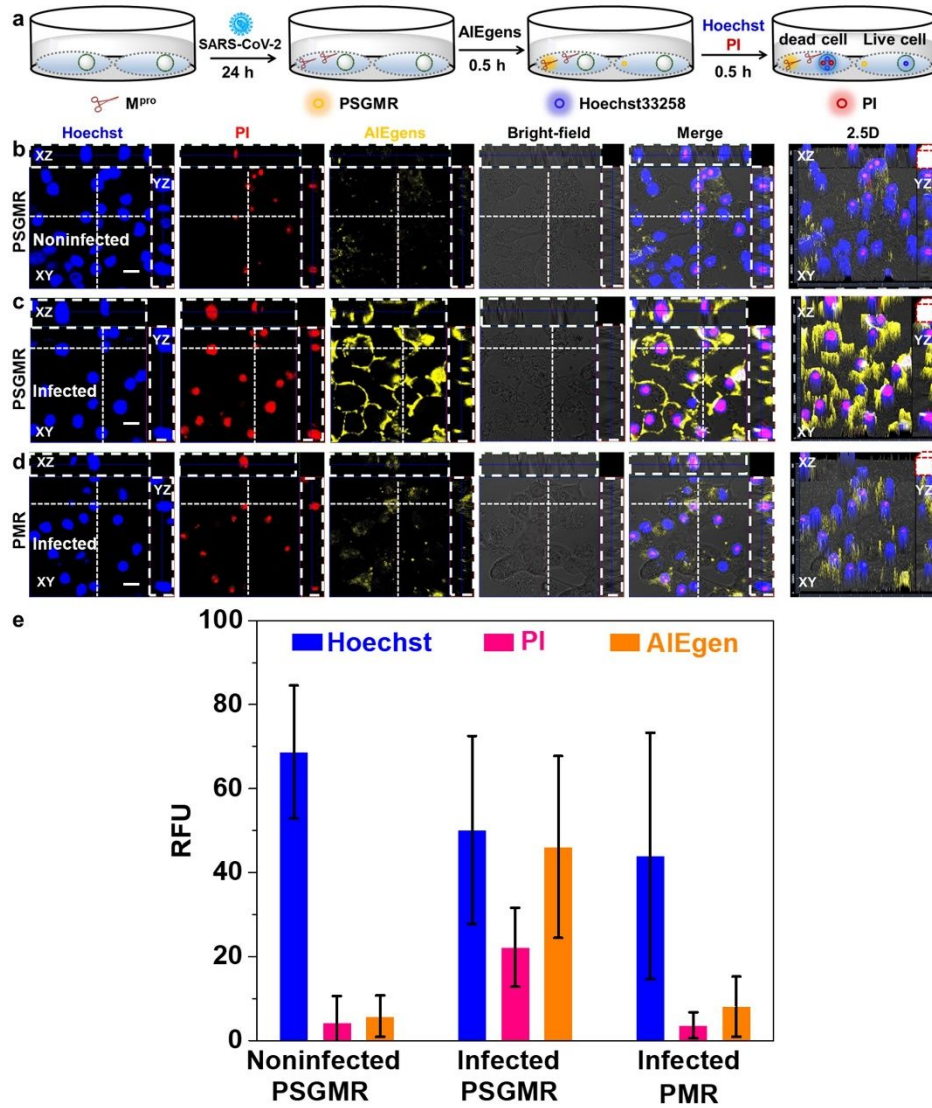

**Figure S43.** SARS-CoV-2 infected TMPRSS2-Vero cells incubation with Hoechst 33258, PI, PSGMR, and PMR. (a) The experimental scheme. (b) Noninfected cells incubated with PSGMR. (c) SARS-CoV-2 infected cells incubation with PSGMR. (d) SARS-CoV-2 infected cells incubation with PMR. (e) The average fluorescence intensities of TMPRSS2-Vero cells incubated with Hoechst 33258, PI, PSGMR, and PMR. Scale bar = 20  $\mu$ m.

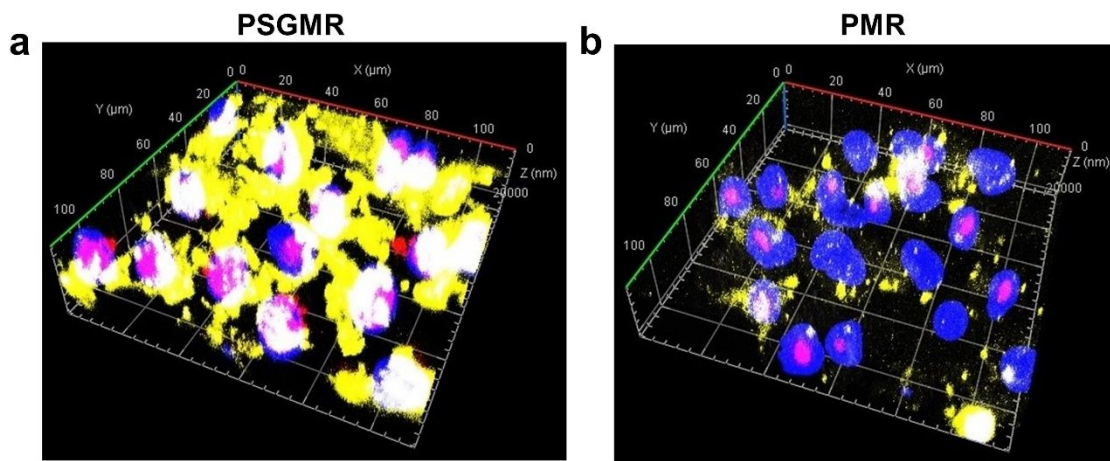

**Figure S44.** Corresponding the three-dimensional map of SARS-CoV-2-infected TMPRSS2-Vero cells incubated with 10  $\mu$ M of (a) PSGMR and (b) PMR for 1 h.



## References:

1. Mellott, D.M. *et al.* A Clinical-Stage Cysteine Protease Inhibitor blocks SARS-CoV-2 Infection of Human and Monkey Cells. *ACS Chem Biol* **16**, 642-650 (2021).
2. Froggatt, H.M., Heaton, B.E. & Heaton, N.S. Development of a Fluorescence-Based, High-Throughput SARS-CoV-2 3CLpro Reporter Assay. *Journal of Virology* **94**, e01265-01220 (2020).
3. Penalver, L. *et al.* A Ligand Selection Strategy Identifies Chemical Probes Targeting the Proteases of SARS-CoV-2. *Angew Chem Int Ed Engl* **60**, 6799-6806 (2021).
4. Cheng, Y. *et al.* Protease-Responsive Prodrug with Aggregation-Induced Emission Probe for Controlled Drug Delivery and Drug Release Tracking in Living Cells. *Anal Chem* **88**, 8913-8919 (2016).
5. Cheng, Y. *et al.* A Multifunctional Peptide-Conjugated AIEgen for Efficient and Sequential Targeted Gene Delivery into the Nucleus. *Angew Chem Int Ed Engl* **58**, 5049-5053 (2019).
6. Yi, X. *et al.* Self-Guiding Polymeric Prodrug Micelles with Two Aggregation-Induced Emission Photosensitizers for Enhanced Chemo-Photodynamic Therapy. *Acs Nano* **15**, 3026–3037 (2021).
